# Supplementary material
Source: PubMed Central journal article supplement (PMC7855056)
Supplement: NIHMS1638539-supplement-1.pdf [file NIHMS1638539-supplement-1.pdf]

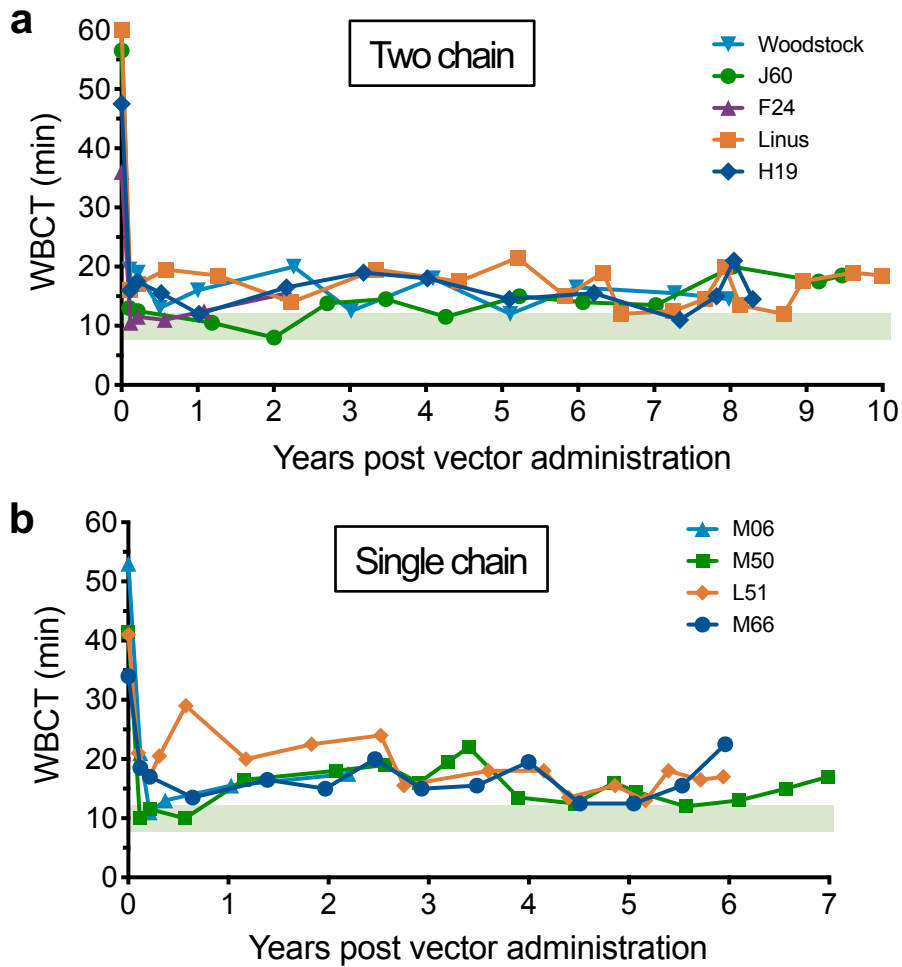

**Supplementary Figure 1**

Whole blood clotting time in the AAV-treated hemophilia A dogs.

(a) Whole blood clotting time (WBCT) after two chain AAV administration in hemophilia A dogs. At baseline the WBCT (min) was >35 minutes. After AAV administration the WBCT shortened to near or within the normal range for dogs (8-12 min, green highlight). (b) Whole blood clotting time (WBCT) after single chain AAV administration in hemophilia A dogs.

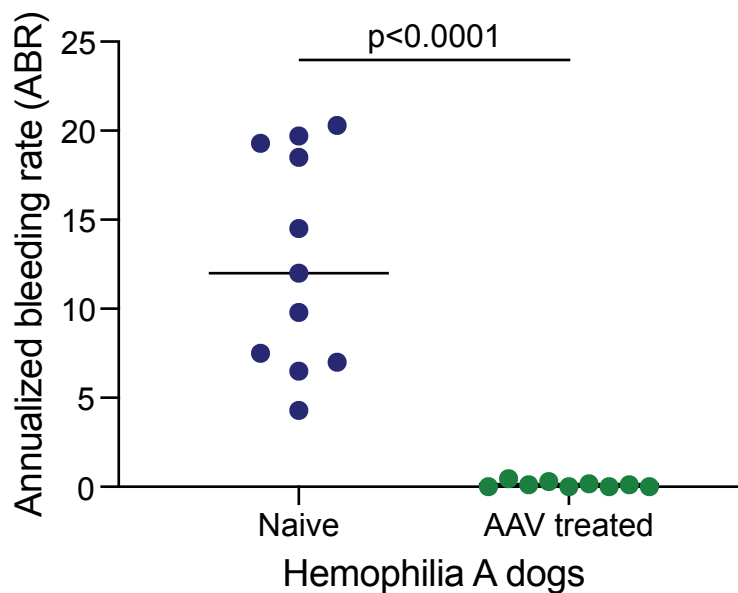

**Supplementary Figure 2**

Annualized bleeding rate (ABR) in the hemophilia A dogs after AAV administration.

Naïve hemophilia A dogs (n=11 biologically independent animals) from two litters were followed prospectively for 4 years to obtain a detailed bleeding history for the dogs (ABR  $12.7 \pm 6.0$ , Mean  $\pm$  Standard Deviation). The AAV treated dogs (n=9 biologically independent animals) were monitored for bleeding events for the duration of the study (ABR  $0.13 \pm 0.16$ ). The ABR was calculated based on the total number of bleeding events/number of years on the study. Each data point represents a hemophilia A dog. After AAV administration, four of the dogs (F24, J60, M50, M66) had FVIII activity levels that were in a range that produces a mild (n=3) or moderate (n=1) hemophilia A phenotype in humans and had no bleeding episodes. The four dogs that had one bleeding episode during the course of the study (Woodstock, H19, M06, L51) had levels of FVIII activity after AAV administration in the severe (n=2), moderate (n=1) or mild range (n=1). Two of these bleeding episodes were documented to be in response to a trauma. Eight of the dogs had either none (n=4) or only one (n=4) documented bleed during the study; one dog (Linus) had three. Notably, Linus had these bleeding episodes during the first two years after AAV administration, when his cFVIII activity levels were between 1-2%; no bleeds were detected at later time points when his cFVIII activity was >2%. Thus, these data suggest that even low levels of FVIII expression after gene therapy improved the bleeding phenotype and correlate with the human clinical phenotype. Two-tailed non-parametric Mann-Whitney U test,  $p < 0.0001$ .

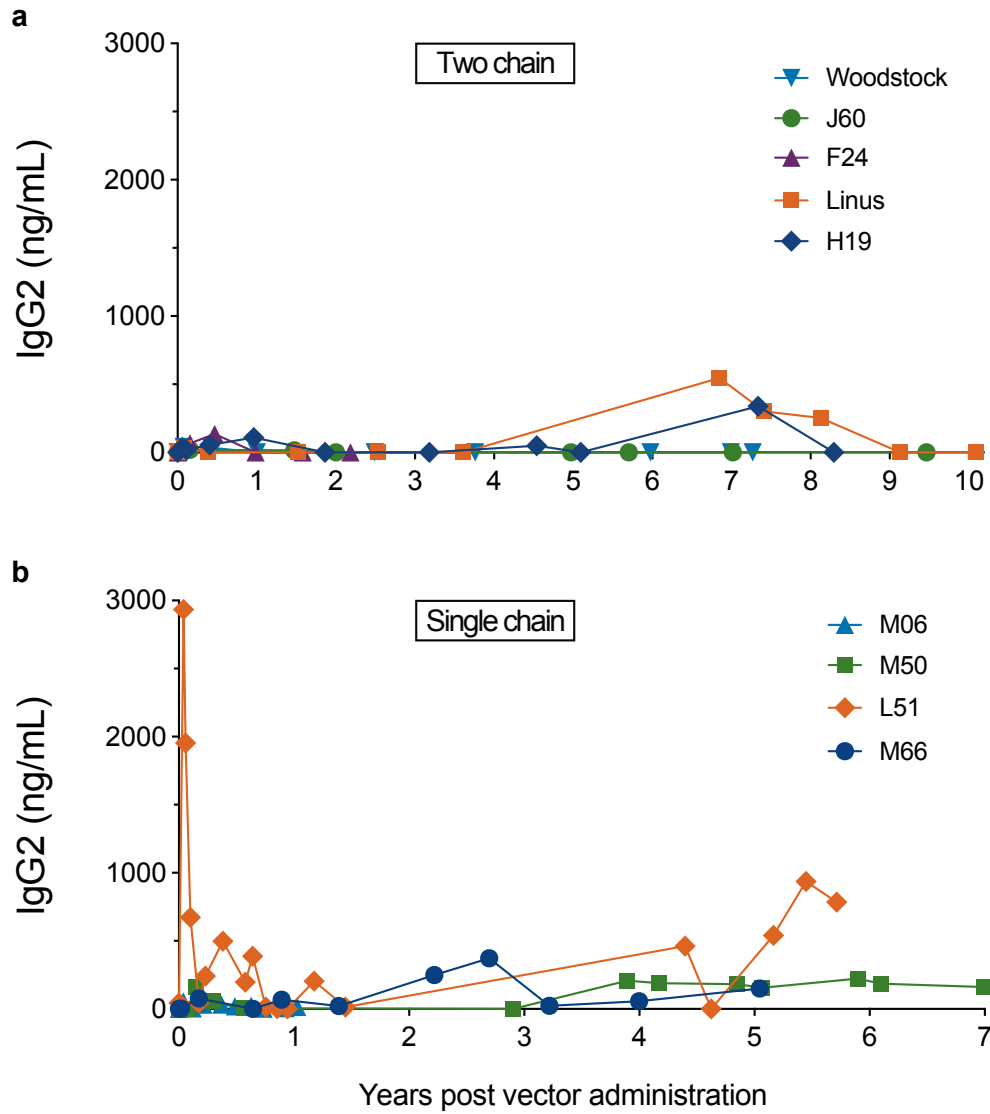

### Supplementary Figure 3

Anti-cFVIII IgG after AAV administration.

IgG2 was assayed by ELISA specific for anti-cFVIII antibodies throughout the study. (a) Anti-cFVIII IgG after AAV delivery in the two chain treated dogs. (b) Anti-cFVIII IgG after AAV delivery in the single chain treated dogs. L51 had an elevation in IgG2 that peaked at 24 days and returned to baseline levels by 50 days after vector administration as we previously reported<sup>6</sup>. In the final year of the study L51 had a low level of anti-cFVIII IgG2 but no neutralizing anti-cFVIII antibodies were detected (0 BU). Hemophilia A dogs with an intron 22 inversion have been shown to develop inhibitors to canine FVIII in both the Chapel Hill and Queen's colonies<sup>56</sup> and this dog was a member of a pedigree containing several litters of inhibitor prone dogs. None of the other dogs had elevated IgG2 levels. No anti-cFVIII IgG1 antibodies were detected. The pre-treatment baseline sample for each dog serves as the control for each respective dog and are shown as zero as described in the Methods. As described in our previous report, we challenged the dogs with cFVIII protein and confirmed that they were tolerant to cFVIII after AAV AAV delivery<sup>6</sup>.

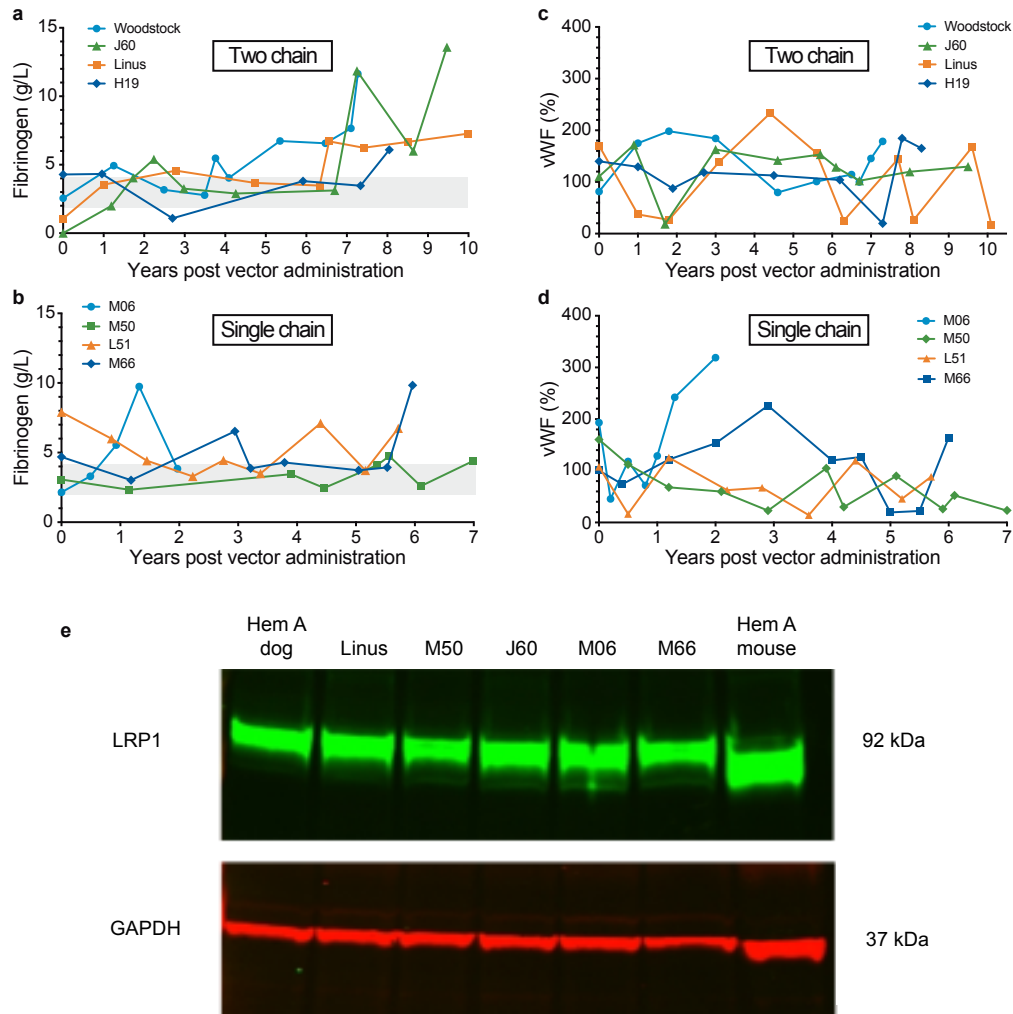

**Supplementary Figure 4**

Analysis of fibrinogen, vWF and clearance receptor, LRP1.

(a) Fibrinogen levels after AAV administration in the two chain treated hemophilia A dogs. (b) Fibrinogen levels after AAV administration in the single chain treated hemophilia A dogs. Fibrinogen levels have been associated with inflammation and some cancers. Fibrinogen levels were assayed at multiple time points in the dogs to determine if there were elevations in the levels suggestive of abnormal liver function but fibrinogen levels remained in the normal range (2-4 g/L; gray highlight) for most of the dogs during the first years of follow-up after AAV delivery. A consistent elevation in plasma fibrinogen levels was observed that increased proportionally with age, which is commonly seen in healthy humans. One dog, M06, had elevated fibrinogen levels beginning at age 1.5 y.o. which correlated with the onset of bleeding associated with mucosal polyps. There was no association with the increase in FVIII levels in Linus and M50 and the onset of the increase in fibrinogen levels. (c) von Willibrand Factor (vWF) levels after AAV administration in the two chain treated hemophilia A dogs. (d) von Willibrand Factor (vWF) levels after AAV administration in the single chain treated hemophilia A dogs. Since the clearance of FVIII is determined by its association with vWF which could influence the FVIII levels in the circulation, the levels of vWF were tested in the dogs over time. Levels of vWF in the plasma after AAV administration ranged between 15 and 230% of normal levels in the AAV treated dogs. Normal canine vWF antigen levels range from 70-180%. The broad range and variability can be attributed to multiple factors including age, genetic variability and acute-phase response that can be influenced by exercise or infections. No correlation was observed between the increase in circulating FVIII in Linus and M50 and the vWF levels. (e) Western Blot analysis of LRP1 levels in the hemophilia A dogs (representative of two independent blots). The clearance of FVIII and vWF is modulated by multiple receptors with LRP1 serving as one of the primary receptors and alterations in the expression of these receptors can influence the clearance of these proteins. Protein was isolated from liver tissue at the terminal time point for each AAV treated hemophilia A dog and an untreated hemophilia A dog. The levels of LRP1 in the livers were determined by Western blot and were analyzed by densitometry. No difference was observed in the LRP1 protein levels in Linus and M50 compared to the other hemophilia A dogs. Thus, the increased levels of FVIII in Linus and M50 are not related to the levels of LRP1.

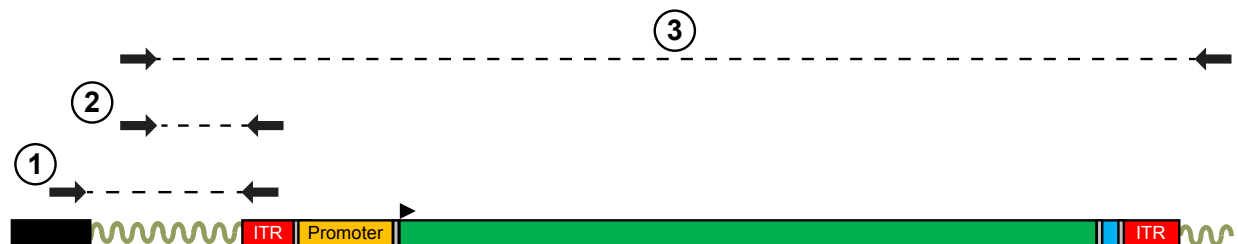

- ① Integration site analysis
- ② Targeted validation using one dog genomic DNA primer and one AAV primer
- ③ Amplification of internal fragment plus junction with dog genome
- ➔ PCR primer
- - - - Amplicon
- Adaptor ligated to permit PCR amplification
- 〰 Dog genomic DNA

### Supplementary Figure 5

Diagram of the PCR strategies used to generate templates for DNA sequencing of junctions between AAV vector sequences and dog genomic DNAs.

The AAV vector genome is shown, flanked by dog genomic sequence (wavy green lines). The PCR strategies are numbered. Strategy 1 was used for the large scale integration site analysis, involving cleaving dog liver genomic DNA with sonication, ligation of DNA adaptors to the broken DNA ends, then PCR amplification from the adaptor to the flanking vector DNA sequence. Methods 2 and 3 rely on advanced knowledge of the integration sites derived from method 1. In method 2, primers were designed to anneal to flanking dog DNA and vector DNA, so that PCR would generate a junction fragment, allowing confirmation of integration sites first detected with method 1. In method 3, two primers are designed to bind each segment of the dog genome flanking the site of vector integration site inferred from the sequence of the vector-dog DNA junction. Method 3 allowed analysis of the full integrated vector sequence. For methods 1 and 3, sequence information was acquired using the Illumina sequencing technology; for method 2 Sanger sequencing was used.

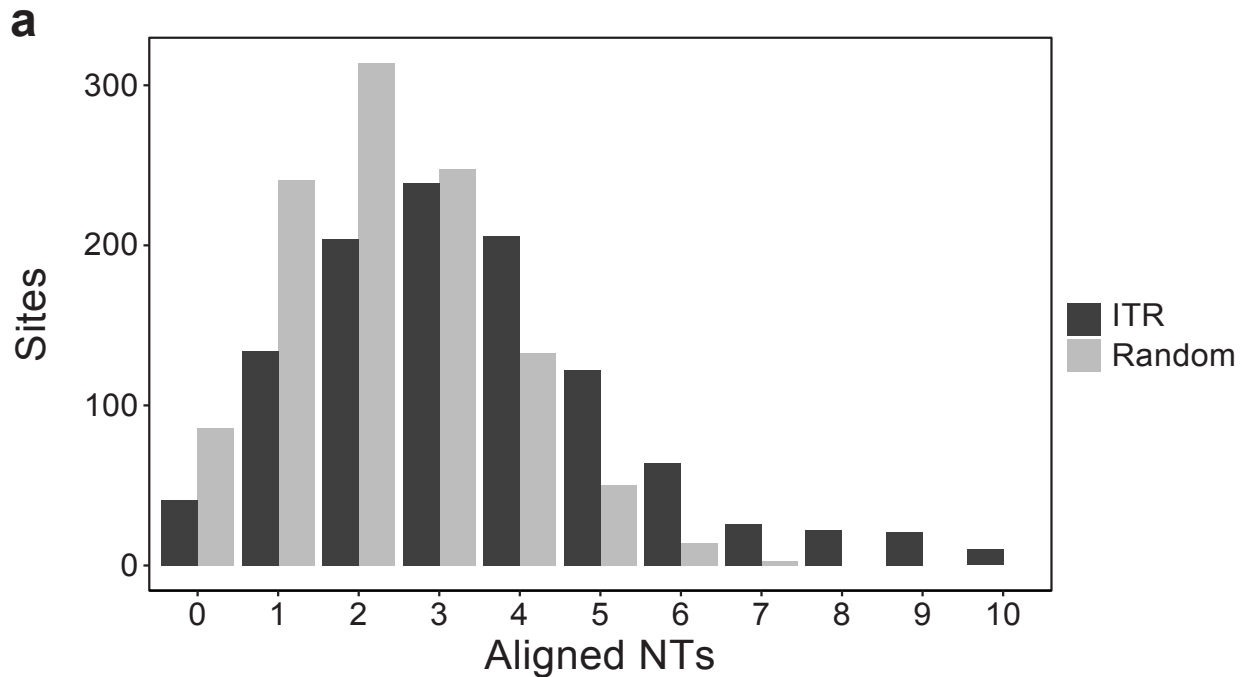

**b**

**chr3+62101419 | 10 aligned NTs | POLN**  
 AACCCCTAGTGATGGAGTTGGCCACTCCC  
 GAAGGGGCTTCTCCAAGTTGGCCACTCCC

**chr25+34592334 | 9 aligned NTs | EGR3**  
 AACCCCTAGTGATGGAGTTGGCCACTCCCTCTCTGCGCGCTCGCTCGCTCACTGAGTACGGGCGA  
 CGGTAGAGGCTTCGGTTCCTCCGGGTGGGGGCAGCCGCCGACCAGAGGGAGGTAGGTACGAGCGA

**chr25+34592383 | 8 aligned NTs | EGR3**  
 AACCCCTAGTGATGGAGTTGGCCACTCCCTCTCTGCGCGC  
 GGGTTCCTCACTTAGGGGGCGCGATCGCCAGGCTGCGCGC

**chr4+14782170 | 7 aligned NTs | EGR2**  
 AACCCCTAGTGATGGAGTTGGCCACTCCCTCTCTGCGCGCTCGCTCGCTCATTGA  
 ATCCATTTTAATCCAAGTCTTTGATATTTAAAAAACGGAGATTCCTTTAATTGA

**Supplementary Figure 6**

AAV ITR micro-homology analysis.

DNA sequence homology between AAV vectors and genomic DNA has the potential to promote integrative recombination. Thus, homology at junctions was assessed statistically. (a) Alignment of the last 10 nucleotides of ITR remnant sequences (1,067 unique integrations) to genomic sequences preceding integration positions yields significantly different distributions of alignment scores compared to randomly selected genome positions where the average of 1,000 different sets of random sequence sets are shown (Bonferroni adjusted Wilcoxon Rank Sum test p-values of alignment scores ranged from 6.8e-54 to 3.2e-33). (b) Select examples of alignments between ITR remnant sequences and genomic sequences where the ITR remnant sequences (top sequence) are shown with genomic sequences (bottom sequence).

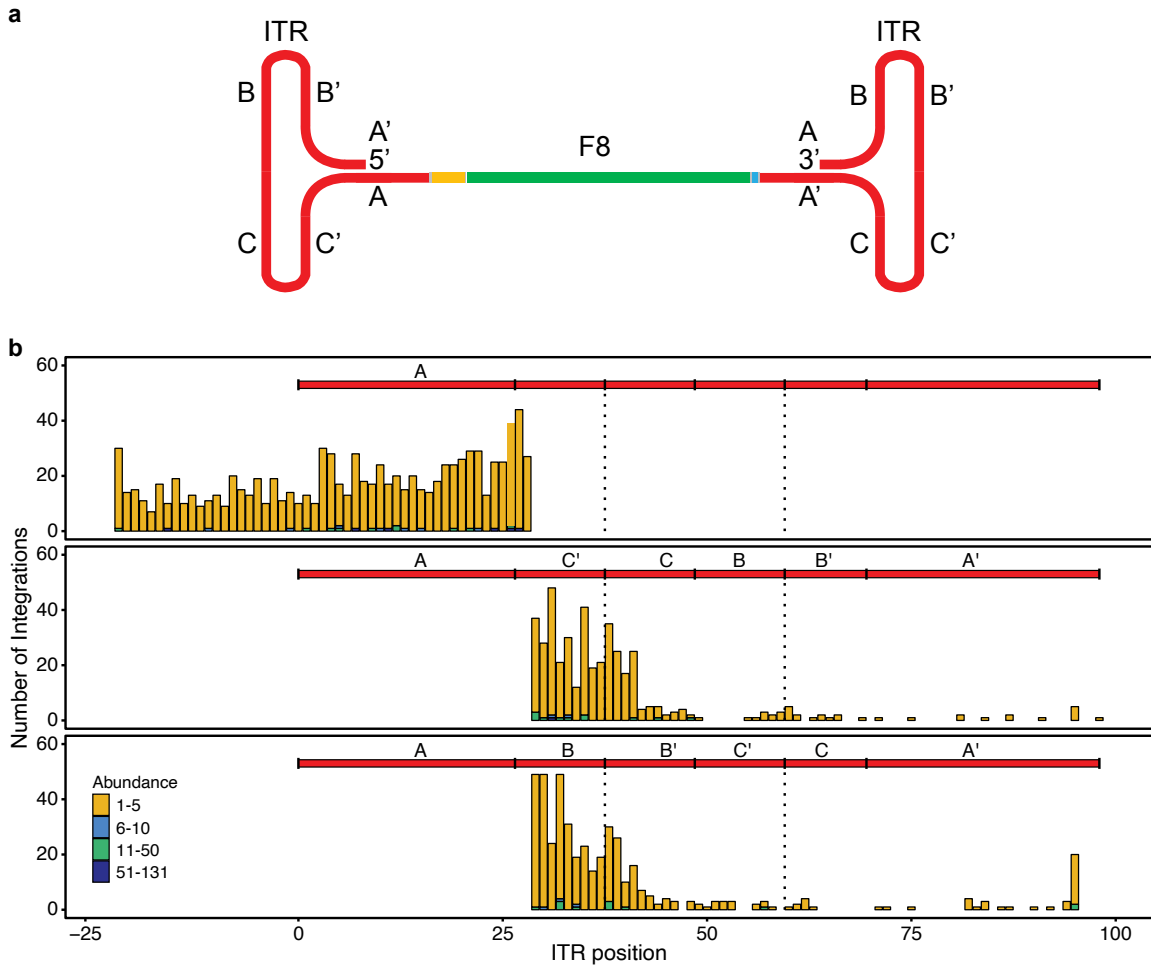

### Supplementary Figure 7

Overview of locations of integration junctions between the AAV ITR and novel flanking sequences.

a) Schematic of the AAV vector construct, illustrating the labeling of the ITR subsequences. b) Sequences at junctions between AAV DNA and dog DNA, illustrating truncation of the terminal ITR sequences. Note that because of the locations of the amplification primers, it was not possible to judge the end of the molecule tested for break points within A. Break points more distal in the ITR could be mapped unambiguously to either end. "Abundance" indicates the sonic abundance of the indicated sequence.

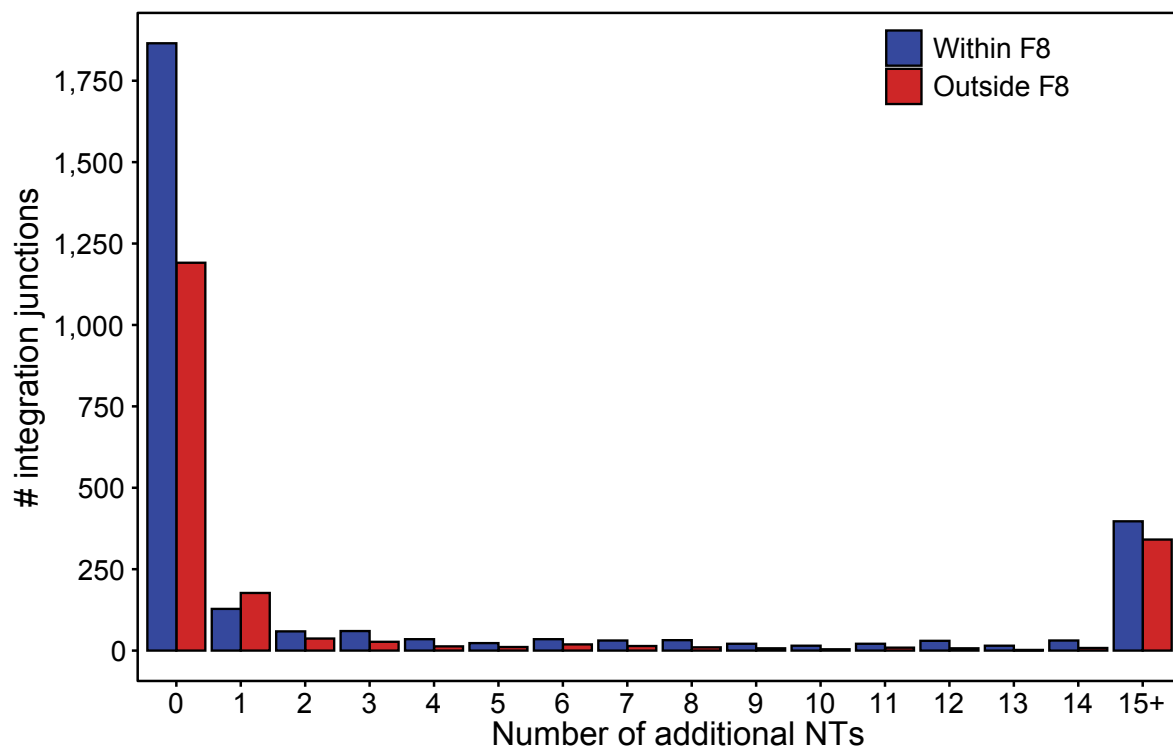

**Supplementary Figure 8**

High frequency of integration of AAV vector sequences in dog liver samples in F8.

The figure plots the relative frequency of integration site junctions, where ITR sequences are linked to dog genomic DNA outside the F8 locus versus within the canine F8 locus (representing vector autointegration). Some integration sites showed insertions between the ITR and other DNA; the x-axis displays the number of additional bases present. As can be seen, the majority of mapped integration events are actually within F8.



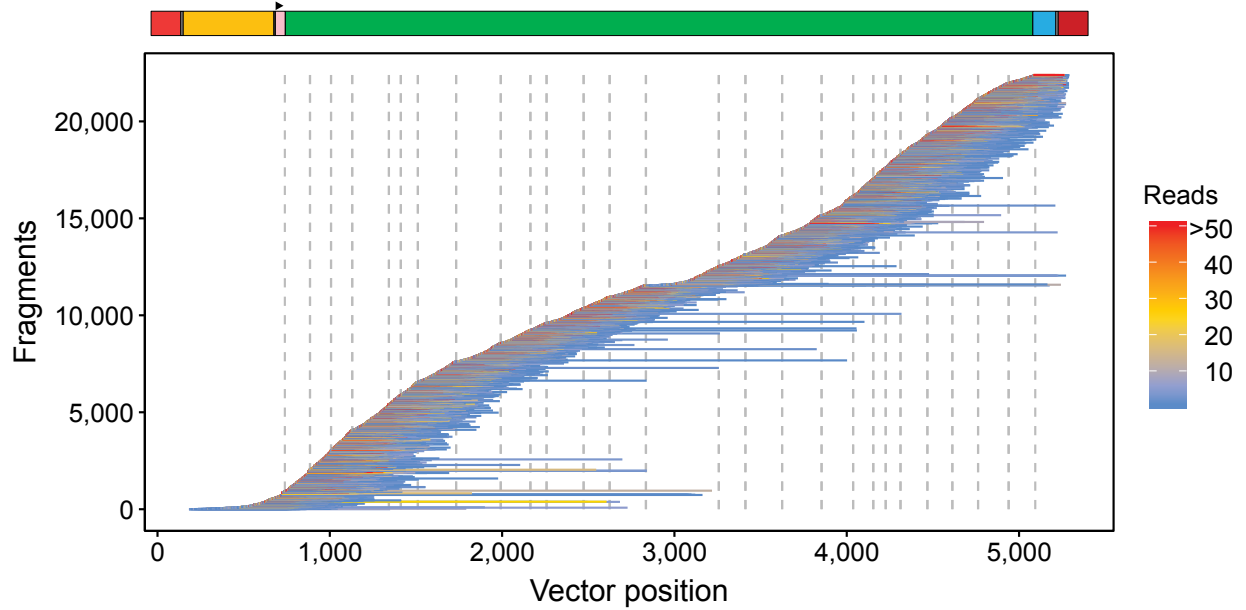

### Supplementary Figure 9

Joining of AAV ITRs to the vector F8 gene and not the chromosomal canine F8 gene

The figure shows the positions of mapped junctions between ITRs and FVIII sequences, mapped on to the vector sequence. The x axis shows the position on the vector map, the y axis shows the cumulative fragment number from bottom to top. The dashed vertical lines show exon junctions, which are present in the vector cDNA but not the chromosomal F8 copy. All reads plotted crossed exon boundaries. In addition, no integration site junctions were found involving F8 intron sequences. These findings indicate that junctions involved the vector FVIII cDNA and not the chromosomal F8 gene.

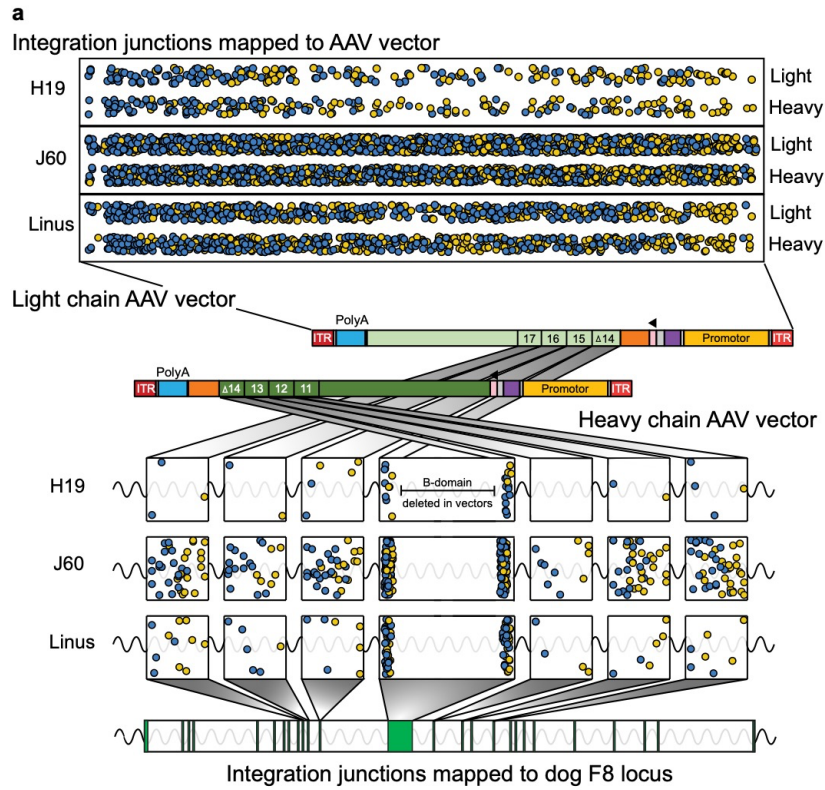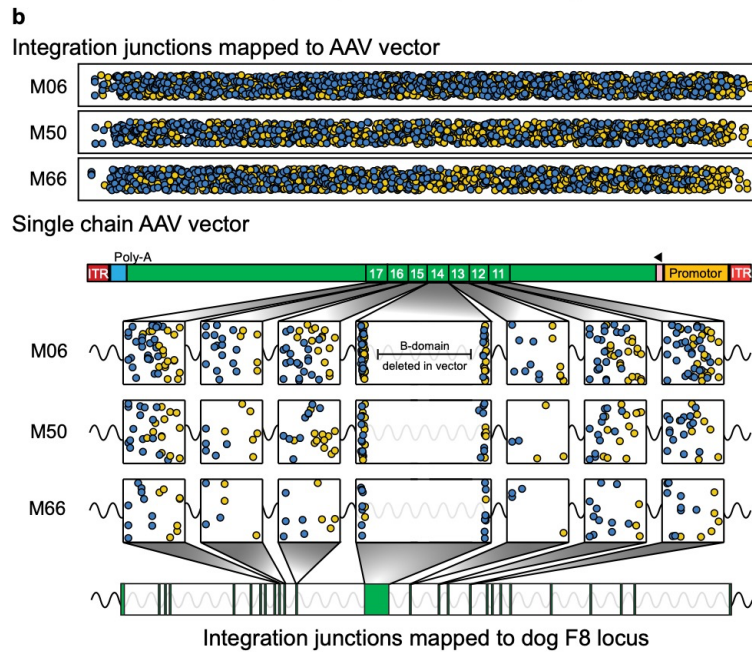

**Supplementary Figure 10**

Mapping sites of autointegration/rearrangements within the AAV vector.

a) Results are shown for the two chain vector. The blue and yellow dots show the positions of integration sites from junctions between ITRs and other vector sequences. Junctions are color coded to show orientation of the integrated segment (blue indicates +, yellow indicates - with respect to the dog genome). Data for each dog is shown as a separate row. The bottom display shows the locations of apparent integration sites in a part of the canine F8 locus. All integration sites are in exons and not introns, and the region encoding the FVIII B domain that is missing in the vector lacks integration sites. For AAV sequences common to both the heavy and light chain vectors, integration sites could map equally well to either. b) as in a), but showing results for dogs treated with the single chain vectors.

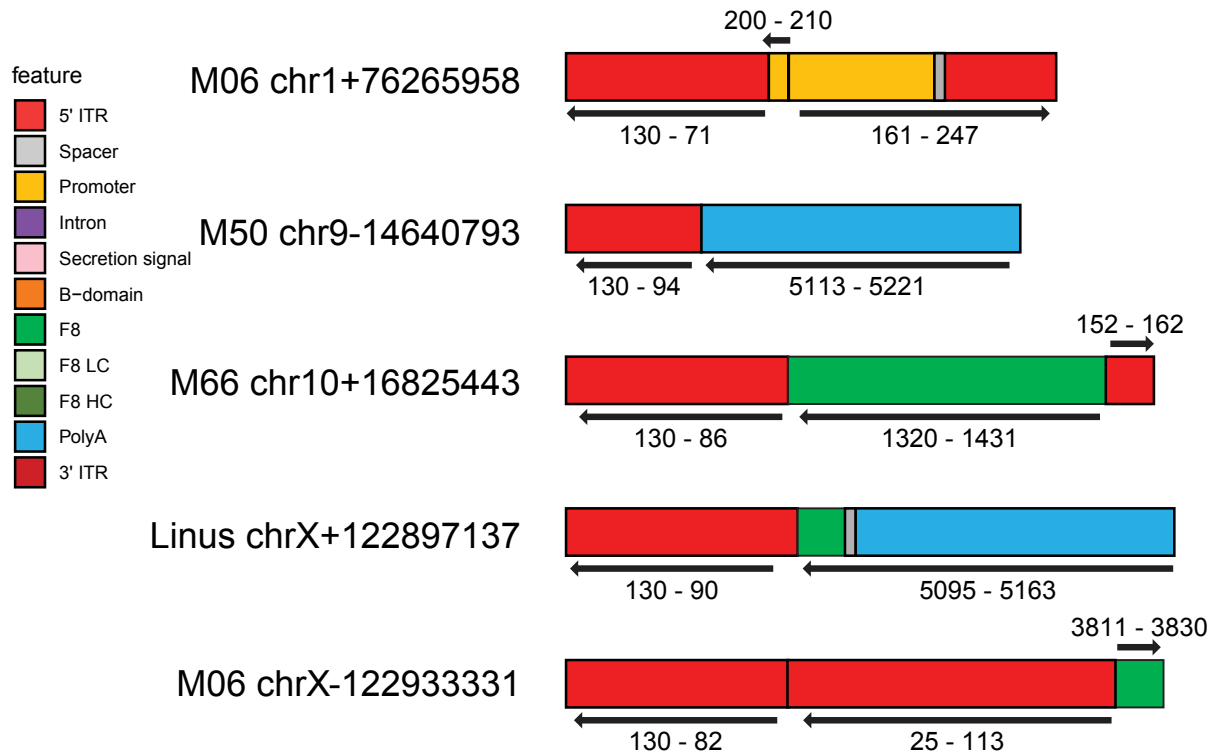

**Supplementary Figure 11**

Examples of rearranged AAV vector sequences, determined by priming from the ITR (Supplementary Figure 5, method 1). The numbers refer to the coordinate in each AAV FVIII vector genome.

**Supplementary Table 1. Liver pathology of AAV-treated hemophilia A dogs.**

| Genotype | Dog ID    | Years Post-AAV Administration | Liver Sample | AAV Delivery Approach | Age at necropsy/ biopsy (years) | Hepatocellular necrosis | Increased connective tissue | Bile duct hyperplasia | Mixed inflammatory cell infiltrates | Pigment lipogranulomas | Hemosiderin-laden macrophages | Hepatic cord atrophy | Nodular hyperplasia | Hepatocellular swelling and clearing |   |   |
|----------|-----------|-------------------------------|--------------|-----------------------|---------------------------------|-------------------------|-----------------------------|-----------------------|-------------------------------------|------------------------|-------------------------------|----------------------|---------------------|--------------------------------------|---|---|
| Hem A    | Woodstock | Pre-AAV                       | WS-Pre       | TC                    | NA                              | 0                       | 0                           | 2                     | 0                                   | 0                      | 0                             | 0                    | 0                   | 3                                    |   |   |
|          |           | 8.2 Final                     | WS Final     |                       | 12.5                            | 0                       | 1                           | 1                     | 0                                   | 1                      | 0                             | 0                    | 0                   | 1                                    | 3 |   |
|          | J60       | 9.5 Final                     | Lobe 1       | TC                    | 10.5                            | 0                       | 1                           | 1                     | 1                                   | 1                      | 0                             | 0                    | 0                   | 0                                    | 1 |   |
|          |           |                               | Lobe 2       |                       |                                 | 0                       | 1                           | 1                     | 0                                   | 1                      | 0                             | 0                    | 0                   | 0                                    | 1 |   |
|          |           |                               | Lobe 3       |                       |                                 | 0                       | 0                           | 0                     | 0                                   | 1                      | 0                             | 0                    | 0                   | 0                                    | 0 |   |
|          |           |                               | Lobe 4       |                       |                                 | 0                       | 0                           | 1                     | 0                                   | 1                      | 0                             | 1                    | 0                   | 0                                    | 0 |   |
|          |           |                               | Lobe 5       |                       |                                 | 0                       | 1                           | 1                     | 1                                   | 1                      | 0                             | 0                    | 0                   | 0                                    | 1 | 0 |
|          | Linus     | Pre-AAV                       | Linus-Pre    | TC                    | NA                              | 0                       | 0                           | 1                     | 0                                   | 0                      | 0                             | 0                    | 0                   | 0                                    | 3 |   |
|          |           | 6.0                           | Biopsy       |                       | 10                              | 0                       | 0                           | 2                     | 0                                   | 0                      | 0                             | 0                    | 0                   | 0                                    | 3 |   |
|          |           | 10.1 Final                    | Lobe 1       |                       | 0                               | 0                       | 1                           | 0                     | 1                                   | 0                      | 0                             | 0                    | 0                   | 0                                    | 0 | 1 |
|          |           |                               | Lobe 2       |                       | 0                               | 0                       | 2                           | 0                     | 1                                   | 2                      | 0                             | 0                    | 0                   | 0                                    | 0 | 1 |
|          |           |                               | Lobe 3       |                       | 0                               | 1                       | 1                           | 0                     | 1                                   | 0                      | 0                             | 0                    | 0                   | 0                                    | 0 | 1 |
|          | Lobe 4    |                               | 0            | 0                     | 1                               | 0                       | 1                           | 0                     | 1                                   | 0                      | 0                             | 0                    | 0                   | 3                                    |   |   |
|          | Lobe 5    | 0                             | 0            | 1                     | 0                               | 1                       | 0                           | 1                     | 0                                   | 0                      | 0                             | 0                    | 2                   |                                      |   |   |
|          | H19       | 8.3 Final                     | H19 Final    | TC                    | 9.3                             | 2                       | 2                           | 2                     | 2                                   | 1                      | 2                             | 0                    | 0                   | 2                                    |   |   |
|          | M06       | 2.3 Final                     | M06 Final    | SC                    | 2.7                             | 0                       | 1                           | 1                     | 2                                   | 1                      | 0                             | 0                    | 0                   | 0                                    | 3 |   |
|          |           | Lobe 1                        | 0            |                       |                                 | 2                       | 1                           | 1                     | 1                                   | 2                      | 0                             | 0                    | 0                   | 2                                    |   |   |
|          | M50       | 7.3 Final                     | Lobe 2       | SC                    | 7.9                             | 0                       | 1                           | 1                     | 0                                   | 1                      | 0                             | 0                    | 0                   | 0                                    | 2 |   |
|          |           |                               | Lobe 3       |                       |                                 | 0                       | 1                           | 1                     | 0                                   | 1                      | 0                             | 0                    | 0                   | 0                                    | 2 |   |
|          |           |                               | Lobe 4       |                       |                                 | 0                       | 1                           | 1                     | 0                                   | 1                      | 0                             | 0                    | 0                   | 0                                    | 2 |   |
| Lobe 5   |           |                               | 0            |                       |                                 | 2                       | 1                           | 1                     | 1                                   | 0                      | 0                             | 0                    | 0                   | 2                                    |   |   |
| L51      |           |                               | 6.1 Final    |                       |                                 | L51 Final               | SC                          | 6.5                   | 1                                   | 2                      | 2                             | 2                    | 3                   | 3                                    | 0 | 0 |
| M66      | 6.0 Final | Lobe 1                        | SC           | 7.5                   | 0                               | 2                       | 1                           | 0                     | 1                                   | 2                      | 0                             | 0                    | 0                   | 1                                    |   |   |
|          |           | Lobe 2                        |              |                       | 0                               | 2                       | 1                           | 0                     | 1                                   | 0                      | 0                             | 0                    | 0                   | 1                                    |   |   |
|          |           | Lobe 3                        |              |                       | 0                               | 2                       | 1                           | 0                     | 1                                   | 2                      | 0                             | 0                    | 0                   | 1                                    |   |   |
|          |           | Lobe 4                        |              |                       | 0                               | 2                       | 1                           | 0                     | 1                                   | 0                      | 0                             | 0                    | 0                   | 1                                    |   |   |
|          |           | Lobe 5                        |              |                       | 0                               | 1                       | 1                           | 0                     | 1                                   | 0                      | 0                             | 0                    | 0                   | 0                                    |   |   |

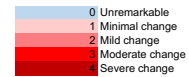

**Supplementary Table 2. Liver pathology of naive hemophilia A, hemophilia B and normal dogs.**

| Genotype | Dog ID       | Age at necropsy (years) | Mean age at necropsy (years) | Hepatocellular necrosis | Increased connective tissue | Bile duct hyperplasia | Mixed inflammatory cell infiltrates | Pigment lipogranulomas | Hemosiderin-laden macrophages | Hepatic cord atrophy | Nodular hyperplasia | Hepatocellular swelling and clearing |
|----------|--------------|-------------------------|------------------------------|-------------------------|-----------------------------|-----------------------|-------------------------------------|------------------------|-------------------------------|----------------------|---------------------|--------------------------------------|
| Hem A    | S32          | 3.7                     | 5.5 ± 2.2                    | 0                       | 0                           | 0                     | 0                                   | 0                      | 0                             | 0                    | 0                   | 4                                    |
|          | P19          | 6.7                     |                              | 1                       | 2                           | 2                     | 1                                   | 2                      | 2                             | 0                    | 0                   | 0                                    |
|          | T03-Lawrence | 2.3                     |                              | 0                       | 1                           | 1                     | 0                                   | 0                      | 0                             | 0                    | 0                   | 0                                    |
|          | O94          | 5.8                     |                              | 0                       | 0                           | 0                     | 0                                   | 0                      | 3                             | 0                    | 0                   | 0                                    |
|          | L57          | 5.4                     |                              | 0                       | 1                           | 1                     | 0                                   | 0                      | 0                             | 0                    | 0                   | 0                                    |
|          | Diamond      | 9.2                     |                              | 0                       | 2                           | 2                     | 1                                   | 3                      | 1                             | 0                    | 0                   | 0                                    |
|          | F26          | 7.7                     |                              | 0                       | 1                           | 1                     | 1                                   | 1                      | 0                             | 0                    | 0                   | 0                                    |
|          | G56-Daisy    | 2.7                     |                              | 0                       | 1                           | 1                     | 0                                   | 3                      | 3                             | 0                    | 0                   | 0                                    |
|          | Black Jack   | 7.0                     |                              | 0                       | 1                           | 1                     | 0                                   | 2                      | 1                             | 0                    | 0                   | 0                                    |
|          | E02          | 4.8                     |                              | 0                       | 1                           | 1                     | 0                                   | 0                      | 0                             | 0                    | 0                   | 0                                    |
| Hem B    | S12          | 5.0                     | 5.6 ± 3.1                    | 0                       | 2                           | 2                     | 2                                   | 2                      | 1                             | 0                    | 0                   | 2                                    |
|          | S14          | 5.0                     |                              | 0                       | 2                           | 2                     | 0                                   | 1                      | 0                             | 0                    | 0                   | 0                                    |
|          | P41          | 6.7                     |                              | 0                       | 1                           | 2                     | 0                                   | 1                      | 1                             | 0                    | 0                   | 0                                    |
|          | P05          | 6.2                     |                              | 0                       | 1                           | 1                     | 0                                   | 1                      | 0                             | 0                    | 0                   | 0                                    |
|          | O40          | 4.7                     |                              | 0                       | 0                           | 0                     | 0                                   | 1                      | 0                             | 0                    | 0                   | 0                                    |
|          | G35          | 11.6                    |                              | 0                       | 2                           | 2                     | 2                                   | 3                      | 2                             | 0                    | 0                   | 0                                    |
|          | O24          | 3.0                     |                              | 0                       | 0                           | 0                     | 1                                   | 1                      | 0                             | 0                    | 0                   | 0                                    |
|          | L11          | 1.3                     |                              | 0                       | 2                           | 2                     | 0                                   | 1                      | 0                             | 0                    | 0                   | 0                                    |
|          | Z91          | 8.8                     |                              | 0                       | 1                           | 1                     | 0                                   | 1                      | 1                             | 0                    | 0                   | 0                                    |
|          | D22          | 12.3                    |                              | 0                       | 1                           | 1                     | 0                                   | 1                      | 0                             | 0                    | 0                   | 0                                    |
| WT       | Elton        | 14.0                    | 11.7 ± 2.4                   | 0                       | 2                           | 1                     | 1                                   | 1                      | 0                             | 0                    | 0                   | 2                                    |
|          | I34          | 13.0                    |                              | 0                       | 2                           | 1                     | 1                                   | 1                      | 0                             | 0                    | 0                   | 2                                    |
|          | I32          | 12.9                    |                              | 0                       | 3                           | 1                     | 1                                   | 1                      | 1                             | 0                    | 3                   | 2                                    |
|          | I23          | 10.7                    |                              | 0                       | 1                           | 0                     | 0                                   | 0                      | 0                             | 0                    | 0                   | 0                                    |
|          | I31          | 9.3                     |                              | 0                       | 2                           | 1                     | 1                                   | 3                      | 1                             | 0                    | 0                   | 4                                    |
|          | J42          | 6.4                     |                              | 0                       | 3                           | 2                     | 1                                   | 1                      | 1                             | 0                    | 0                   | 2                                    |
|          | E16          | 9.8                     |                              | 0                       | 3                           | 2                     | 2                                   | 2                      | 0                             | 0                    | 0                   | 1                                    |
|          | X13          | 12.1                    |                              | 0                       | 2                           | 2                     | 0                                   | 2                      | 0                             | 0                    | 0                   | 0                                    |

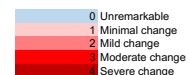

**Supplementary Table 3. Anti-AAV8 neutralizing antibody titers after AAV administration.**

| Hem<br>A<br>Dog | Total<br>Vector<br>Dose<br>(vg/kg) | Baseline<br>Anti-<br>AAV8<br>NAb titer | Anti-AAV8 NAb titer post vector administration |          |         |         |                     | Final<br>Timepoint<br>(yr) |
|-----------------|------------------------------------|----------------------------------------|------------------------------------------------|----------|---------|---------|---------------------|----------------------------|
|                 |                                    |                                        | 0.5<br>month                                   | 6 months | 1 year  | 4 years | Final               |                            |
| F24             | 2.5 x 10 <sup>13</sup>             | <1:1                                   | >1:3155                                        | >1:3155  | >1:3155 | ND      | >1:3155             | 2.2                        |
| Linus           | 1.2 x 10 <sup>13</sup>             | <1:1                                   | >1:3155                                        | >1:3155  | >1:3155 | >1:3155 | 1:316 to<br>1:1000  | 10.0                       |
| M06             | 4.0 x 10 <sup>13</sup>             | <1:1                                   | >1:3155                                        | >1:3155  | >1:3155 | ND      | >1:3155             | 2.0                        |
| M50             | 4.0 x 10 <sup>13</sup>             | <1:1                                   | >1:3155                                        | >1:3155  | >1:3155 | >1:3155 | 1:1000 to<br>1:3155 | 7.0                        |
| L51             | 2.0 x 10 <sup>13</sup>             | <1:1                                   | >1:3155                                        | >1:3155  | >1:3155 | >1:3155 | >1:3155             | 5.7                        |
| M66             | 2.0 x 10 <sup>13</sup>             | 1:1 to<br>1:3.16                       | >1:3155                                        | >1:3155  | >1:3155 | >1:3155 | 1:1000 to<br>1:3155 | 6.0                        |

**Supplementary Table 4. Comparison of AAV administration details for Linus and M50.**

|                                    | <b>Linus</b>         | <b>M50</b>         |
|------------------------------------|----------------------|--------------------|
| AAV serotype                       | AAV8                 | AAV8               |
| Vector delivery approach           | Two Chain            | Single Chain       |
| Promoter                           | TBG                  | hAAT               |
| Total vector dose (vg/kg)          | $1.2 \times 10^{13}$ | $4 \times 10^{13}$ |
| Age at vector administration (yrs) | 4                    | 0.6                |
| Clinical concerns                  | None                 | None               |

**Supplementary Table 5. Vector copy number analysis per liver lobe in the hemophilia A dogs.**

| <b>Hem A Dog</b> | <b>Lobe</b> | <b># Liver samples/lobe</b> | <b>Mean VCN ± SD</b> |
|------------------|-------------|-----------------------------|----------------------|
| J60              | 1           | 5                           | 2.13 ± 0.82          |
|                  | 2           | 6                           | 4.03 ± 2.21          |
|                  | 3           | 6                           | 3.91 ± 2.87          |
|                  | 4           | 6                           | 4.09 ± 3.30          |
|                  | 5           | 6                           | 2.78 ± 1.65          |
| Linus            | 1           | 3                           | 0.36 ± 0.22          |
|                  | 2           | 3                           | 0.15 ± 0.20          |
|                  | 3           | 3                           | 0.33 ± 0.17          |
|                  | 4           | 3                           | 0.39 ± 0.30          |
|                  | 5           | 3                           | 0.19 ± 0.12          |
| M50              | 1           | 6                           | 0.38 ± 0.34          |
|                  | 2           | 5                           | 0.64 ± 0.43          |
|                  | 3           | 6                           | 0.18 ± 0.26          |
|                  | 4           | 6                           | 0.20 ± 0.26          |
|                  | 5           | 6                           | 0.41 ± 0.30          |
| M66              | 1           | 3                           | 0.09 ± 0.16          |
|                  | 2           | 2                           | 0.33                 |
|                  | 3           | 3                           | 0.18 ± 0.11          |
|                  | 4           | 3                           | 0.45 ± 0.03          |
|                  | 5           | 3                           | 0.40 ± 0.22          |

**Supplementary Table 6. Integration site data sets studied.**

| Dog   | Sample ID | Liver Lobe | Years Post-AAV | Delivery Approach | VCN  | Sample Mass | Number of Sites in Canine Genome | Number of in Vector Sites* | Percent Sites in Vector |
|-------|-----------|------------|----------------|-------------------|------|-------------|----------------------------------|----------------------------|-------------------------|
| M50   | GTSP2160  | 4          | 7              | Single Chain      | 0.27 | 110.31      | 50                               | 278                        | 84.75                   |
| M50   | GTSP2161  | 4          | 7              | Single Chain      | 1.14 | 123.83      | 111                              | 413                        | 84.66                   |
| M50   | GTSP2162  | 4          | 7              | Single Chain      | 0.65 | 112.62      | 99                               | 352                        | 82.61                   |
| M66   | GTSP2163  | 2          | 6              | Single Chain      | 0.27 | 110.47      | 54                               | 273                        | 87.07                   |
| M66   | GTSP2164  | 1          | 6              | Single Chain      | 0.23 | 154.32      | 74                               | 344                        | 87.39                   |
| M66   | GTSP2165  | 3          | 6              | Single Chain      | 0.42 | 126.71      | 33                               | 330                        | 94.00                   |
| M06   | GTSP2175  | 1          | 2              | Single Chain      | 0.78 | 221.69      | 318                              | 3033                       | 70.37                   |
| M06   | GTSP2176  | 3          | 2              | Single Chain      | 2.04 | 100.26      | 162                              | 2135                       | 81.56                   |
| M06   | GTSP2177  | 8          | 2              | Single Chain      | 1.22 | 218.04      | 288                              | 3079                       | 72.31                   |
| Linus | GTSP2166  | 2          | 10             | Two Chain         | 0.54 | 73.89       | 30                               | 285                        | 91.80                   |
| Linus | GTSP2167  | 3          | 10             | Two Chain         | 0.14 | 59.22       | 31                               | 98                         | 76.52                   |
| Linus | GTSP2168  | 3          | 10             | Two Chain         | 0.62 | 148.12      | 70                               | 399                        | 86.77                   |
| H19   | GTSP2169  | 3          | 8.5            | Two Chain         | 0.14 | 157.31      | 73                               | 127                        | 66.05                   |
| H19   | GTSP2170  | 6          | 8.5            | Two Chain         | 0.07 | 123.90      | 53                               | 104                        | 66.67                   |
| H19   | GTSP2171  | 9          | 8.5            | Two Chain         | 0.18 | 244.65      | 34                               | 84                         | 72.00                   |
| J60   | GTSP2172  | 1          | 9.5            | Two Chain         | 7.28 | 194.45      | 110                              | 4075                       | 89.11                   |
| J60   | GTSP2173  | 2          | 9.5            | Two Chain         | 3.06 | 123.72      | 96                               | 2936                       | 90.09                   |
| J60   | GTSP2174  | 1          | 9.5            | Two Chain         | 1.33 | 111.78      | 65                               | 1079                       | 87.68                   |

\* Sites arising from reads aligning to vector elements shared between the heavy and light chain vectors were averaged



**Supplementary Table 7. Results of validation attempts for selected integration sites using targeted PCR and Sanger sequencing.**

| <b>Dog</b> | <b>Site<br/>(Chromosome<br/>Position)</b> | <b>Sonic<br/>Abundance</b> | <b>Nearest<br/>Gene</b> | <b>Sanger<br/>Sequence<br/>Validation</b> |
|------------|-------------------------------------------|----------------------------|-------------------------|-------------------------------------------|
| M50        | 25_34590970                               | 28.5%                      | EGR3                    | Yes                                       |
| M50        | 14_55620581                               | 13.0%                      | MET                     | Yes                                       |
| M50        | 15_42531469                               | 7.3%                       | GLT8D2                  | Yes                                       |
| M50        | 4_14832997                                | 13.4%                      | EGR2                    | Yes                                       |
| M50        | 4_14757686                                | 10.6%                      | EGR2                    | Yes                                       |
| M50        | 12_38081605                               | 17.3%                      | RPLPOP2                 | No                                        |
| M66        | 4_14709696                                | 36.2%                      | EGR2                    | No                                        |
| Linus      | 4_14733827                                | 20.3%                      | EGR2                    | Yes                                       |
| Linus      | 25_34587602                               | 21.4%                      | EGR3                    | Yes                                       |
| Linus      | 37_13443531                               | 15.1%                      | PQRD3                   | Yes                                       |
| Linus      | 4_14681249                                | 6.7%                       | ADO                     | No                                        |
| Linus      | 18_48493167                               | 4.3%                       | LTO                     | No                                        |
| Linus      | 22_1840213                                | 34.7%                      | DLEU2                   | Yes                                       |
| J60        | 18_48600092                               | 17.1%                      | CCND1                   | Yes                                       |
| J60        | 25_34458017                               | 25.9%                      | PEBP4                   | Yes                                       |
| J60        | 4_14552338                                | 9.8%                       | ZNF365                  | Yes                                       |
| J60        | 18_48578102                               | 4.3%                       | CCND1                   | No                                        |
| J60        | 25_34548677                               | 44.4%                      | PEBP4                   | Yes                                       |
| HO2        | 10_19438765                               | 2.0%                       | TBC1D22A                | No                                        |
| HO2        | 21_30040507                               | 2.0 %                      | GVINP1                  | No                                        |

**Supplementary Table 8. Calculated numbers of targeted AAV-host junctions in samples used for validation attempts.**

| Primer Target Site<br>(Chromosome Position) | Direction | VCN  | Relative Sonic Abundance | Abundance of Integration Per Nanogram DNA | Number of Integration Site Junctions in Reaction | Nanograms DNA in Reaction |
|---------------------------------------------|-----------|------|--------------------------|-------------------------------------------|--------------------------------------------------|---------------------------|
| 25_34590970                                 | Forward   | 0.27 | 0.285                    | 13.99                                     | 165.0                                            | 11.8                      |
| 25_34590970                                 | Reverse   | 0.27 | 0.285                    | 13.99                                     | 70.0                                             | 5.0                       |
| 14_55620581                                 | Forward   | 1.14 | 0.13                     | 26.95                                     | 140.0                                            | 5.2                       |
| 14_55620581                                 | Reverse   | 1.14 | 0.13                     | 26.95                                     | 70.0                                             | 2.6                       |
| 15_42531469                                 | Forward   | 1.14 | 0.073                    | 15.13                                     | 140.0                                            | 9.3                       |
| 15_42531469                                 | Reverse   | 1.14 | 0.073                    | 15.13                                     | 70.0                                             | 4.6                       |
| 4_14832997                                  | Forward   | 0.65 | 0.134                    | 15.84                                     | 41.0                                             | 2.6                       |
| 4_14832997                                  | Reverse   | 0.65 | 0.134                    | 15.84                                     | 27.0                                             | 1.7                       |
| 4_14757686                                  | Forward   | 0.65 | 0.106                    | 12.53                                     | 41.0                                             | 3.3                       |
| 4_14757686                                  | Reverse   | 0.65 | 0.106                    | 12.53                                     | 41.0                                             | 3.3                       |
| 12_38081605                                 | Forward   | 0.65 | 0.173                    | 20.45                                     | 41.0                                             | 2.0                       |
| 12_38081605                                 | Reverse   | 0.65 | 0.173                    | 20.45                                     | 41.0                                             | 2.0                       |
| 4_14709696                                  | Forward   | 0.42 | 0.362                    | 27.64                                     | 37.6                                             | 1.4                       |
| 4_14709696                                  | Reverse   | 0.42 | 0.362                    | 27.64                                     | 37.6                                             | 1.4                       |
| 4_14733827                                  | Forward   | 0.54 | 0.203                    | 19.93                                     | 82.0                                             | 4.1                       |
| 4_14733827                                  | Reverse   | 0.54 | 0.203                    | 19.93                                     | 82.0                                             | 4.1                       |
| 25_34587602                                 | Forward   | 0.54 | 0.214                    | 21.01                                     | 82.0                                             | 3.9                       |
| 25_34587602                                 | Reverse   | 0.54 | 0.214                    | 21.01                                     | 52.0                                             | 2.5                       |
| 37_13443531                                 | Forward   | 0.14 | 0.151                    | 3.84                                      | 15.0                                             | 3.9                       |
| 37_13443531                                 | Reverse   | 0.14 | 0.151                    | 3.84                                      | 31.0                                             | 8.1                       |
| 4_14681249                                  | Forward   | 0.62 | 0.067                    | 7.55                                      | 31.0                                             | 4.1                       |
| 4_14681249                                  | Reverse   | 0.62 | 0.067                    | 7.55                                      | 31.0                                             | 4.1                       |
| 18_48493167                                 | Forward   | 0.62 | 0.043                    | 4.85                                      | 2.5                                              | 0.5                       |
| 18_48493167                                 | Reverse   | 0.62 | 0.043                    | 4.85                                      | 2.5                                              | 0.5                       |
| 22_1840213                                  | Forward   | 0.62 | 0.347                    | 39.12                                     | 103.00                                           | 2.6                       |
| 22_1840213                                  | Reverse   | 0.62 | 0.347                    | 39.12                                     | 103.00                                           | 2.6                       |
| 18_48600092                                 | Forward   | 7.28 | 0.171                    | 226.34                                    | 1150.0                                           | 5.1                       |
| 18_48600092                                 | Reverse   | 7.28 | 0.171                    | 226.34                                    | 1150.0                                           | 5.1                       |
| 25_34458017                                 | Forward   | 3.06 | 0.259                    | 144.10                                    | 600.0                                            | 4.2                       |
| 25_34458017                                 | Reverse   | 3.06 | 0.259                    | 144.10                                    | 600.0                                            | 4.2                       |
| 4_14552338                                  | Forward   | 1.33 | 0.098                    | 23.70                                     | 113.0                                            | 4.8                       |
| 4_14552338                                  | Reverse   | 1.33 | 0.098                    | 23.70                                     | 370.0                                            | 15.6                      |
| 18_48578102                                 | Forward   | 1.33 | 0.043                    | 10.40                                     | 5.0                                              | 0.5                       |
| 18_48578102                                 | Reverse   | 1.33 | 0.043                    | 10.40                                     | 5.0                                              | 0.5                       |
| 25_34548677                                 | Forward   | 1.33 | 0.444                    | 107.37                                    | 226.00                                           | 2.1                       |
| 25_34548677                                 | Reverse   | 1.33 | 0.444                    | 107.37                                    | 226.00                                           | 2.1                       |
| 10_19438765                                 | Forward   | 0.27 | 0.02                     | 0.98                                      | 3.8                                              | 3.9                       |
| 10_19438765                                 | Reverse   | 0.27 | 0.02                     | 0.98                                      | 3.8                                              | 3.9                       |
| 21_30040507                                 | Forward   | 0.27 | 0.02                     | 0.98                                      | 3.8                                              | 3.9                       |
| 21_30040507                                 | Reverse   | 0.27 | 0.02                     | 0.98                                      | 3.8                                              | 3.9                       |

**Supplementary Table 9. KEGG pathway enrichment analysis.**

| Term ID | Protein | Hits | p Value* | p Value FDR** | Term Description                       |
|---------|---------|------|----------|---------------|----------------------------------------|
| 04520   | 70      | 5    | 0.0000   | 0.0001        | Adherens junction                      |
| 05218   | 69      | 4    | 0.0000   | 0.0009        | Melanoma                               |
| 05100   | 73      | 4    | 0.0000   | 0.0009        | Bacterial invasion of epithelial cells |
| 05200   | 320     | 6    | 0.0001   | 0.0025        | Pathways in cancer                     |
| 04330   | 47      | 3    | 0.0002   | 0.0039        | Notch signaling pathway                |
| 04310   | 135     | 4    | 0.0003   | 0.0041        | Wnt signaling pathway                  |
| 05166   | 250     | 5    | 0.0003   | 0.0041        | HTLV-I infection                       |
| 05161   | 139     | 4    | 0.0003   | 0.0041        | Hepatitis B                            |
| 04390   | 146     | 4    | 0.0003   | 0.0044        | Hippo signaling pathway                |
| 05203   | 181     | 4    | 0.0008   | 0.0089        | Viral carcinogenesis                   |
| 05215   | 85      | 3    | 0.0010   | 0.0092        | Prostate cancer                        |
| 04151   | 336     | 5    | 0.0010   | 0.0092        | PI3K-Akt signaling pathway             |
| 01100   | 1161    | 9    | 0.0011   | 0.0092        | Metabolic pathways                     |
| 04510   | 202     | 4    | 0.0012   | 0.0092        | Focal adhesion                         |
| 04015   | 204     | 4    | 0.0012   | 0.0092        | Rap1 signaling pathway                 |
| 04919   | 115     | 3    | 0.0023   | 0.0166        | Thyroid hormone signaling pathway      |
| 04530   | 127     | 3    | 0.0031   | 0.0206        | Tight junction                         |
| 05206   | 143     | 3    | 0.0043   | 0.0272        | MicroRNAs in cancer                    |
| 04630   | 154     | 3    | 0.0053   | 0.0317        | Jak-STAT signaling pathway             |
| 05014   | 50      | 2    | 0.0059   | 0.0317        | Amyotrophic lateral sclerosis (ALS)    |
| 05213   | 50      | 2    | 0.0059   | 0.0317        | Endometrial cancer                     |
| 00330   | 57      | 2    | 0.0076   | 0.0374        | Arginine and proline metabolism        |
| 05131   | 57      | 2    | 0.0076   | 0.0374        | Shigellosis                            |
| 05211   | 64      | 2    | 0.0095   | 0.0439        | Renal cell carcinoma                   |
| 04144   | 192     | 3    | 0.0097   | 0.0439        | Endocytosis                            |
| 04115   | 66      | 2    | 0.0101   | 0.0439        | p53 signaling pathway                  |
| 04917   | 69      | 2    | 0.0110   | 0.0460        | Prolactin signaling pathway            |
| 04810   | 208     | 3    | 0.0121   | 0.0477        | Regulation of actin cytoskeleton       |
| 03008   | 73      | 2    | 0.0122   | 0.0477        | Ribosome biogenesis in eukaryotes      |

\* KEGG enrichment computed using a hypergeometric test

\*\*False discovery rate (FDR) calculated using the Benjamini-Hochberg procedure

**Supplementary Table 10. Integration site clusters identified using Scan Statistics (FDR 0.2; length <0.5Mb)**

| <b>Chromosome</b> | <b>Start</b> | <b>End</b> | <b>Width</b> | <b>Gene</b> | <b>Hits*</b> |
|-------------------|--------------|------------|--------------|-------------|--------------|
| 4                 | 14530145     | 14924592   | 394448       | EGR2        | 7            |
| 4                 | 39589684     | 39589877   | 194          | DUSP1       | 26           |
| 13                | 62155847     | 62632404   | 476558       | ALB         | 5            |
| 18                | 48484014     | 48821243   | 337230       | CCND1       | 14           |
| 25                | 34458017     | 34601125   | 143109       | EGR3        | 15           |

\* Number of calls against 50 random sets

**Supplementary Table 11. Primer sequences for integration site experiments.**

| <b>Primer<br/>(Validation Primers<br/>Listed as Target Site<br/>Chromosome Position)</b> | <b>Direction</b> | <b>Sequence</b>                                                                        |
|------------------------------------------------------------------------------------------|------------------|----------------------------------------------------------------------------------------|
| PCR1 linker primer                                                                       | Forward          | GCCATGCTACTTATCTACGTAGCCATGC                                                           |
| PCR2 linker primer                                                                       | Forward          | GGTTCCTTG TAGTTAATGATTAACCCGCC                                                         |
| ITR inner boundary primer                                                                | Reverse          | AGAGGGAGTGGCCAACTCCATCACTAGGGGTTCTTG TAGT<br>TAATGATTAACCCGCCATGCTACTTATCTACGTAGCCATGC |
| SEQ primer                                                                               | N/A              | CCTTG TAGTTAATGATTAACCCGCC                                                             |
| 25_34590970                                                                              | Forward          | CCACTCGCGAAGA AACTCCG                                                                  |
| 25_34590970                                                                              | Reverse          | CGACGTCA CAATGGAAGCTCC                                                                 |
| 14_55620581                                                                              | Forward          | CTCCAGCACGTGACTACACC                                                                   |
| 14_55620581                                                                              | Reverse          | GACCACAGTTTAAACTGGAAAGGTCTATGG                                                         |
| 15_42531469                                                                              | Forward          | GCCTCAGTCAGTGAAGAATCTGC                                                                |
| 15_42531469                                                                              | Reverse          | GGAGTCTGCAACAATAGTCTTCATTGTTGG                                                         |
| 4_14832997                                                                               | Forward          | GGCAAAGGAGCAACATGATCAGG                                                                |
| 4_14832997                                                                               | Reverse          | CGGACAGTGAGTTCCTTAGATGGGC                                                              |
| 4_14757686                                                                               | Forward          | CCCATCTATTCAA AATTGCTAACAGTATCTTTCATGG                                                 |
| 4_14757686                                                                               | Reverse          | GTCACATTCTGAAGA ACCAGGGTTAGG                                                           |
| 12_38081605                                                                              | Forward          | GCAGGATTGCAGGATACTAGGC                                                                 |
| 12_38081605                                                                              | Reverse          | CTACATCAAGAATCTCTCTCCCATGTTCC                                                          |
| 4_14709696                                                                               | Forward          | ATCCAACAAATAAACTAGCAAACAAGTTGCTGG                                                      |
| 4_14709696                                                                               | Reverse          | GTATGCAAATCGGCCATGTGACG                                                                |
| 4_14733827                                                                               | Forward          | CCAAGGAGGTTGCAGAAGAGG                                                                  |
| 4_14733827                                                                               | Reverse          | CAGTGAAAAGGGTACGTGCAAGG                                                                |
| 25_34587602                                                                              | Forward          | CCTTGGCATTCTCACCTGAGC                                                                  |
| 25_34587602                                                                              | Reverse          | GCTGCCTCTGTAAGCAGGG                                                                    |
| 37_13443531                                                                              | Forward          | GCTAACAACTTTTGGAAATAGGGGAATGG                                                          |
| 37_13443531                                                                              | Reverse          | CTATTATCAGGGTTTTCGAGGATAGCC                                                            |
| 4_14681249                                                                               | Forward          | GGAAATTAGACCTTTCTCTGATGTGTCAATTGC                                                      |
| 4_14681249                                                                               | Reverse          | CTATTCAAAAGTTTGTCCAATAGCCACATGC                                                        |
| 18_48493167                                                                              | Forward          | GTTGACCAGAGACAGGTGGG                                                                   |
| 18_48493167                                                                              | Reverse          | GTATCGCCCGAGACAGAACC                                                                   |
| 22_1840213                                                                               | Forward          | GAGAGACGGAGAGCCTATCAAGC                                                                |
| 22_1840213                                                                               | Reverse          | CTGAGAACCAGTGGACTTAGGTATATTTACCC                                                       |
| 18_48600092                                                                              | Forward          | CCTGGGGAGAATGTATCTAGTGGG                                                               |
| 18_48600092                                                                              | Reverse          | CCGGGCACCTCTGTAACC                                                                     |
| 25_34458017                                                                              | Forward          | GCATGTGCATGACACTTAGATGGG                                                               |
| 25_34458017                                                                              | Reverse          | CACAGCAAGTGGATGCAGAGC                                                                  |
| 4_14552338                                                                               | Forward          | CACAGTGTGGGTACACACTCC                                                                  |
| 4_14552338                                                                               | Reverse          | CAAGCTTGCCTGTGACCATCC                                                                  |
| 18_48578102                                                                              | Forward          | CAGCCAGGACGTATGAACAGG                                                                  |
| 18_48578102                                                                              | Reverse          | CAGATGGACACACAGCAGTGG                                                                  |
| 25_34548677                                                                              | Forward          | GGTTTCACAGA ACCGCCAGG                                                                  |
| 25_34548677                                                                              | Reverse          | GGCTTCCATACTCAGCTCTAGTGG                                                               |
| 10_19438765                                                                              | Forward          | GCCCAGAGCCCATCTTACC                                                                    |
| 10_19438765                                                                              | Reverse          | GCCGGAGTCTCTTGACAGG                                                                    |
| 21_30040507                                                                              | Forward          | CCACAGTTGTCCCTGAAGGG                                                                   |
| 21_30040507                                                                              | Reverse          | GTCCATGGCCTGTGTCAGC                                                                    |
| AAV ITR Primer                                                                           | N/A              | GCATGGCTACGTAGATAAGTAGCATGG                                                            |

**Supplementary Table 12. Integration sites in the dog genome that were recovered from two or more cells independently (sonic abundance of two or more).**

| Dog   | Timepoint | Position       | Abundance | ITR Remnant length | Nearest Gene    | Distance | Nearest oncogene | Distance | Validated       |
|-------|-----------|----------------|-----------|--------------------|-----------------|----------|------------------|----------|-----------------|
| J60   | y9.5      | chr25-34548677 | 130       | 39                 | PEBP4           | 0        | EGR3             | -42611   | Sanger/Long PCR |
| Linus | y10       | chr22-1840213  | 118       | 16                 | DLEU2,DLEU2L    | 0        | DLEU2            | 0        | Nextera         |
| M50   | y7        | chr25-34590970 | 87        | 59                 | EGR3            | -318     | EGR3             | -318     | Nextera         |
| J60   | y9.5      | chr18*48600108 | 59        | 63                 | CCND1           | -90384   | CCND1            | -90384   | Sanger/Long PCR |
| Linus | y10       | chr25-34587602 | 54        | 58                 | EGR3            | -3686    | EGR3             | -3686    | Nextera         |
| Linus | y10       | chr25*34591227 | 54        | 43                 | EGR3            | -100     | EGR3             | -100     | NA              |
| Linus | y10       | chr25+34592325 | 50        | 56                 | EGR3            | 0        | EGR3             | 0        | NA              |
| J60   | y9.5      | chr25-34458017 | 48        | 64                 | PEBP4           | 0        | RHOBTB2          | -128882  | Sanger/Long PCR |
| Linus | y10       | chr17*49576466 | 47        | 76                 | ALMS1,EGR4      | 0        | LOXL3            | 965375   | NA              |
| Linus | y10       | chr4+14733827  | 44        | 37                 | EGR2            | -21855   | EGR2             | -21855   | Sanger          |
| M50   | y7        | chr12+38081605 | 37        | 44                 | RPLP0P2         | 674      | PHIP             | 1816387  | Short PCR       |
| M50   | y7        | chr25-34591015 | 31        | 127                | EGR3            | -273     | EGR3             | -273     | NA              |
| J60   | y9.5      | chr4+14552338  | 30        | 67                 | ZNF365          | 0        | EGR2             | 153044   | Sanger/Long PCR |
| Linus | y10       | chr37+13443531 | 28        | 41                 | PARD3,PARD3B    | 0        | RAPH1            | -1097001 | Nextera         |
| M50   | y7        | chr14-55620581 | 28        | 62                 | MET             | -5864    | MET              | -5864    | Sanger          |
| Linus | y10       | chr25+34592334 | 27        | 65                 | EGR3            | 0        | EGR3             | 0        | NA              |
| J60   | y9.5      | chr4+14731055  | 26        | 72                 | EGR2            | -19083   | EGR2             | -19083   | NA              |
| M50   | y7        | chr4-14832997  | 26        | 67                 | EGR2            | -121025  | EGR2             | -121025  | Sanger          |
| M50   | y7        | chr4*14757682  | 24        | 127                | EGR2            | -45706   | EGR2             | -45706   | Nextera         |
| Linus | y10       | chr4-14799029  | 23        | 53                 | EGR2            | -87057   | EGR2             | -87057   | NA              |
| Linus | y10       | chr23+25225414 | 22        | 64                 | TBC1D5          | 0        | SATB1            | 530445   | NA              |
| J60   | y9.5      | chr4+14789031  | 21        | 61                 | EGR2            | -77059   | EGR2             | -77059   | NA              |
| Linus | y10       | chr4+14681204  | 21        | 26                 | ADO             | -17060   | EGR2             | 24178    | Failed          |
| M50   | y7        | chr4*14801145  | 20        | 51                 | EGR2            | -89160   | EGR2             | -89160   | Failed          |
| M50   | y7        | chr15+42531619 | 19        | 44                 | GLT8D2          | 0        | HSP90B1          | 57500    | NA              |
| M66   | y6        | chr4+14709696  | 18        | 61                 | EGR2            | 0        | EGR2             | 0        | Long PCR        |
| Linus | y10       | chr4-14712837  | 17        | 80                 | EGR2            | -865     | EGR2             | -865     | NA              |
| Linus | y10       | chr18*48556878 | 16        | 89                 | CCND1           | -47154   | CCND1            | -47154   | NA              |
| M50   | y7        | chr15-42531469 | 16        | 66                 | GLT8D2          | 0        | HSP90B1          | 57350    | Nextera         |
| Linus | y10       | chr23+43995528 | 14        | 70                 | CP              | 0        | HLTF             | -76924   | NA              |
| M50   | y7        | chr4-14598472  | 14        | 61                 | ZNF365          | 13629    | EGR2             | 106910   | NA              |
| M66   | y6        | chr4+14710334  | 14        | 64                 | EGR2            | 0        | EGR2             | 0        | NA              |
| Linus | y10       | chr18+48493167 | 13        | 33                 | LTO1            | 3195     | CCND1            | 5806     | Long PCR        |
| Linus | y10       | chr4+14732408  | 13        | 70                 | EGR2            | -20436   | EGR2             | -20436   | NA              |
| M50   | y7        | chr4+14714125  | 13        | 64                 | EGR2            | -2153    | EGR2             | -2153    | NA              |
| J60   | y9.5      | chr18*48578093 | 12        | 70                 | CCND1           | -68377   | CCND1            | -68377   | Failed          |
| Linus | y10       | chr4+14759642  | 12        | 36                 | EGR2            | -47670   | EGR2             | -47670   | NA              |
| J60   | y9.5      | chr4+14802452  | 11        | 73                 | EGR2            | -90480   | EGR2             | -90480   | NA              |
| Linus | y10       | chr25+34591807 | 10        | 37                 | EGR3            | 0        | EGR3             | 0        | NA              |
| Linus | y10       | chr21-39487582 | 10        | 45                 | PLEKHA7         | 0        | MYOD1            | -770244  | NA              |
| Linus | y10       | chr5-78404628  | 10        | 61                 | ZFH3            | 46069    | ZFH3             | 46069    | NA              |
| J60   | y9.5      | chr4+14849034  | 9         | 63                 | NRBF2           | -109158  | EGR2             | -137062  | NA              |
| J60   | y9.5      | chr18-48785343 | 9         | 64                 | TPCN2           | 167424   | CCND1            | -275635  | NA              |
| Linus | y10       | chr18-48501832 | 9         | 54                 | CCND1           | 0        | CCND1            | 0        | NA              |
| M50   | y7        | chr18+48484620 | 9         | 21                 | LTO1            | 0        | CCND1            | 14353    | NA              |
| Linus | y10       | chr25+34591962 | 7         | 42                 | EGR3            | 0        | EGR3             | 0        | NA              |
| Linus | y10       | chr18-48760360 | 7         | 66                 | TPCN2           | 192407   | CCND1            | -250652  | NA              |
| M06   | y2        | chr12-53183015 | 7         | 62                 | CELF4           | 0        | EPHA7            | -877840  | NA              |
| M50   | y7        | chr4-14832991  | 7         | 67                 | EGR2            | -121019  | EGR2             | -121019  | NA              |
| J60   | y9.5      | chr4+14563609  | 6         | 47                 | ZNF365          | 0        | EGR2             | 141773   | NA              |
| J60   | y9.5      | chr4+14711850  | 6         | 65                 | EGR2            | 0        | EGR2             | 0        | NA              |
| J60   | y9.5      | chr3+2490737   | 5         | 72                 | MAN2A1          | -13287   | APC              | -2110233 | NA              |
| Linus | y10       | chr18+48493174 | 5         | 33                 | LTO1            | 3202     | CCND1            | 5799     | NA              |
| M50   | y7        | chr4-14709564  | 5         | 31                 | EGR2            | 0        | EGR2             | 0        | NA              |
| H19   | y8.5      | chr32-4667479  | 4         | 71                 | CFAP299         | 0        | FGF5             | 134689   | NA              |
| Linus | y10       | chr18+48501970 | 4         | 71                 | CCND1           | 0        | CCND1            | 0        | NA              |
| Linus | y10       | chr13-21450894 | 4         | 41                 | DERL1           | 0        | RNF139           | -1108984 | NA              |
| Linus | y10       | chr4-14709639  | 4         | 43                 | EGR2            | 0        | EGR2             | 0        | NA              |
| Linus | y10       | chr4+14782170  | 4         | 55                 | EGR2            | -70198   | EGR2             | -70198   | NA              |
| M06   | y2        | chr4-39589762  | 4         | 67                 | DUSP1           | 0        | MIXL1            | -165217  | NA              |
| M50   | y7        | chr18-48543799 | 4         | 47                 | CCND1           | -34091   | CCND1            | -34091   | NA              |
| M50   | y7        | chr18-48623683 | 4         | 36                 | CCND1           | -113975  | CCND1            | -113975  | NA              |
| H19   | y8.5      | chr8+72693342  | 3         | 61                 | JAG2,PACS2,TMEM | 0        | JAG2             | 0        | NA              |
| J60   | y9.5      | chr18+48736726 | 3         | 64                 | TPCN2           | 216041   | CCND1            | -227018  | NA              |
| J60   | y9.5      | chr11*26044659 | 3         | 64                 | EGR1            | -1288    | EGR1             | -1288    | NA              |
| J60   | y9.5      | chr15+6230997  | 3         | 50                 | AGO3            | 0        | THRAP3           | -208604  | NA              |
| J60   | y9.5      | chr18+48500622 | 3         | 71                 | CCND1           | 0        | CCND1            | 0        | NA              |
| J60   | y9.5      | chr2*32199118  | 3         | 69                 | PITRM1          | 0        | KLF6             | 535042   | NA              |
| J60   | y9.5      | chr4-14789791  | 3         | 54                 | EGR2            | -77819   | EGR2             | -77819   | NA              |
| Linus | y10       | chr4-14785464  | 3         | 26                 | EGR2            | -73492   | EGR2             | -73492   | NA              |
| Linus | y10       | chr4-14713726  | 3         | 65                 | EGR2            | -1754    | EGR2             | -1754    | NA              |
| Linus | y10       | chr18-48584297 | 3         | 52                 | CCND1           | -74589   | CCND1            | -74589   | NA              |
| Linus | y10       | chr18*48722018 | 3         | 67                 | CCND1           | -212308  | CCND1            | -212308  | NA              |
| Linus | y10       | chr18+48584456 | 3         | 69                 | CCND1           | -74748   | CCND1            | -74748   | NA              |
| Linus | y10       | chr25-30507351 | 3         | 32                 | STMN4           | 155046   | CLU              | 506629   | NA              |
| M50   | y7        | chr21-6506179  | 3         | 64                 | MRE11           | 0        | MRE11            | 0        | NA              |
| M50   | y7        | chr25-34590999 | 3         | 40                 | EGR3            | -289     | EGR3             | -289     | NA              |
| M50   | y7        | chr7+67593155  | 3         | 58                 | YES1            | 0        | YES1             | 0        | NA              |
| M50   | y7        | chrX+71350380  | 3         | 19                 | ACTN1           | 230697   | HNRNPK           | -1711394 | NA              |
| M50   | y7        | chr2-66688859  | 3         | 70                 | SIAH1           | -16203   | ZNF423           | 908202   | NA              |
| M50   | y7        | chr18-48513636 | 3         | 41                 | CCND1           | -3928    | CCND1            | -3928    | NA              |
| M50   | y7        | chr4-14788834  | 3         | 71                 | EGR2            | -76862   | EGR2             | -76862   | NA              |
| M66   | y6        | chr4*14722170  | 3         | 22                 | EGR2            | -10148   | EGR2             | -10148   | NA              |
| H19   | y8.5      | chr1-45651422  | 2         | 61                 | LOC105378068    | 398922   | ARID1B           | -719139  | NA              |
| H19   | y8.5      | chr10-45097655 | 2         | 35                 | FAM178B         | 0        | CNNM4            | 59781    | NA              |

|       |      |                |   |     |                |         |             |          |    |
|-------|------|----------------|---|-----|----------------|---------|-------------|----------|----|
| H19   | y8.5 | chr15+39094941 | 2 | 74  | ANKS1B         | 0       | APAF1       | 977914   | NA |
| H19   | y8.5 | chr30-23830049 | 2 | 21  | MINDY2         | 2558    | GCNT3       | -654693  | NA |
| H19   | y8.5 | chr33+11774631 | 2 | 67  | CBLB           | -302183 | CBLB        | -302183  | NA |
| H19   | y8.5 | chr36-24205150 | 2 | 63  | UBE2E3,UBE2E4P | 0       | PDE11A      | -2475504 | NA |
| H19   | y8.5 | chr9-36088961  | 2 | 28  | C17orf64       | -6674   | USP32       | -79132   | NA |
| H19   | y8.5 | chr1+116987164 | 2 | 46  | RBM42          | -1439   | FXYD5       | 425710   | NA |
| H19   | y8.5 | chr1+116987171 | 2 | 46  | RBM42          | -1446   | FXYD5       | 425703   | NA |
| H19   | y8.5 | chr10+1129800  | 2 | 76  | SDR9C7         | -9069   | NAB2        | -96754   | NA |
| H19   | y8.5 | chr2+73264837  | 2 | 65  | GNP2           | 3291    | ZDHHHC18    | 9346     | NA |
| H19   | y8.5 | chr34+21096771 | 2 | 50  | LPP            | 0       | LPP         | 0        | NA |
| H19   | y8.5 | chr5+61633275  | 2 | 73  | ERRFI1         | 0       | ERRFI1      | 0        | NA |
| H19   | y8.5 | chr7-40039717  | 2 | 13  | NVL            | -2038   | TP53BP2     | -256559  | NA |
| H19   | y8.5 | chr7+61474770  | 2 | 69  | CHST9          | -98960  | SS18        | -1016075 | NA |
| H19   | y8.5 | chr8-7267761   | 2 | 68  | AK3            | -161625 | FOXG1       | -1010286 | NA |
| H19   | y8.5 | chr9+4143400   | 2 | 49  | ST6GALNAC2     | -14478  | ST6GALNAC1  | 19437    | NA |
| H19   | y8.5 | chr1+38773155  | 2 | 38  | SAMD5          | 203006  | LATS1       | 1656972  | NA |
| J60   | y9.5 | chr1-86823525  | 2 | 66  | TRPM3          | 0       | HMG2P46     | -373233  | NA |
| J60   | y9.5 | chr10-331748   | 2 | 69  | SUOX           | 0       | ERBB3       | -8201    | NA |
| J60   | y9.5 | chr18+48736654 | 2 | 41  | TPCN2          | 216113  | CCND1       | -226946  | NA |
| J60   | y9.5 | chr34+38763204 | 2 | 27  | NAALADL2       | 0       | ECT2        | 1803894  | NA |
| J60   | y9.5 | chr36-9749057  | 2 | 61  | GRB14          | 0       | LRP2        | 4161391  | NA |
| J60   | y9.5 | chr4*14701825  | 2 | 76  | ADO            | 0       | EGR2        | 3561     | NA |
| J60   | y9.5 | chr4-14924592  | 2 | 62  | NRBF2          | -33600  | EGR2        | -212620  | NA |
| J60   | y9.5 | chr4+14715301  | 2 | 62  | EGR2           | -3329   | EGR2        | -3329    | NA |
| J60   | y9.5 | chr13+62168428 | 2 | 61  | ALB            | 0       | RASSF6      | 130134   | NA |
| J60   | y9.5 | chr18-44600867 | 2 | 58  | CD82           | 57628   | CD82        | 57628    | NA |
| J60   | y9.5 | chr18-48821243 | 2 | 75  | TPCN2          | 131524  | MAP2K1      | 258795   | NA |
| J60   | y9.5 | chr4*14641819  | 2 | 65  | ADO            | -56469  | EGR2        | 63587    | NA |
| J60   | y9.5 | chr4-14713052  | 2 | 59  | EGR2           | -1080   | EGR2        | -1080    | NA |
| J60   | y9.5 | chr4-14841073  | 2 | 27  | NRBF2          | -117119 | EGR2        | -129101  | NA |
| J60   | y9.5 | chr4+14805710  | 2 | 53  | EGR2           | -93738  | EGR2        | -93738   | NA |
| J60   | y9.5 | chr8-3461643   | 2 | 72  | SLC7A8         | 0       | BCL2L2      | -107759  | NA |
| Linus | y10  | chr10+34424210 | 2 | 27  | SH3RF3         | 0       | RANBP2      | 662940   | NA |
| Linus | y10  | chr18-48645201 | 2 | 16  | CCND1          | -135493 | CCND1       | -135493  | NA |
| Linus | y10  | chr2-20988823  | 2 | 63  | MINDY3         | 0       | CUBN        | 947319   | NA |
| Linus | y10  | chr2+59618697  | 2 | 64  | MT3            | 6153    | AMFR        | -149364  | NA |
| Linus | y10  | chr22+2544527  | 2 | 68  | FNDC3A         | 0       | RB1         | 517092   | NA |
| Linus | y10  | chr25-34591177 | 2 | 43  | EGR3           | -111    | EGR3        | -111     | NA |
| Linus | y10  | chr12-15583942 | 2 | 64  | CD2AP          | 0       | RUNX2       | 1740306  | NA |
| Linus | y10  | chr14-15091597 | 2 | 65  | ZNF804B        | 0       | SRI         | -817304  | NA |
| Linus | y10  | chr18+48491590 | 2 | 54  | LTO1           | 1618    | CCND1       | 7383     | NA |
| Linus | y10  | chr25+34592383 | 2 | 40  | EGR3           | 0       | EGR3        | 0        | NA |
| Linus | y10  | chr30+16775516 | 2 | 12  | AP4E1          | 0       | CYP19A1     | 178885   | NA |
| Linus | y10  | chr1-118074774 | 2 | 44  | LSM14A         | 0       | FXYD5       | -650607  | NA |
| Linus | y10  | chr11-26058613 | 2 | 61  | EGR1           | 8808    | EGR1        | 8808     | NA |
| Linus | y10  | chr18*48522347 | 2 | 55  | CCND1          | -12627  | CCND1       | -12627   | NA |
| Linus | y10  | chr18+48771203 | 2 | 29  | TPCN2          | 181564  | CCND1       | -261495  | NA |
| Linus | y10  | chr22-1840015  | 2 | 38  | DLEU2,DLEU2L   | 0       | DLEU2       | 0        | NA |
| Linus | y10  | chr30+2461957  | 2 | 59  | GJD2           | 15390   | GREM1       | -230128  | NA |
| Linus | y10  | chr4+14753192  | 2 | 75  | EGR2           | -41220  | EGR2        | -41220   | NA |
| M06   | y2   | chr1-110141910 | 2 | 65  | ERCC1,GPR68    | 0       | ERCC1,GPR68 | 0        | NA |
| M06   | y2   | chr12-25761444 | 2 | 61  | KHDRBS2        | 0       | DST         | -1566251 | NA |
| M06   | y2   | chr15+35765032 | 2 | 73  | HAL            | 1609    | ELK3        | -185502  | NA |
| M06   | y2   | chr18-9500676  | 2 | 62  | SUGCT          | 0       | RALA        | 521817   | NA |
| M06   | y2   | chr21-999882   | 2 | 75  | LYAR           | -28458  | MAML2       | -3823223 | NA |
| M06   | y2   | chr26-13854842 | 2 | 107 | NOS1           | 0       | PEBP1       | -667262  | NA |
| M06   | y2   | chr28-15948142 | 2 | 61  | SH3PXD2A       | 0       | SUFU        | 832642   | NA |
| M06   | y2   | chr3+74490062  | 2 | 39  | RELL1          | -3132   | KLF3        | -826168  | NA |
| M06   | y2   | chr34+17067867 | 2 | 53  | DVL3           | 0       | PSMD2       | -112224  | NA |
| M06   | y2   | chr37-18405952 | 2 | 83  | CPS1           | 0       | ERBB4       | 623748   | NA |
| M06   | y2   | chr4-39589745  | 2 | 62  | DUSP1          | 0       | MIXL1       | -165200  | NA |
| M06   | y2   | chr4-39589762  | 2 | 56  | DUSP1          | 0       | MIXL1       | -165217  | NA |
| M06   | y2   | chr4+73281440  | 2 | 59  | PRLR           | 0       | PRLR        | 0        | NA |
| M06   | y2   | chr13-18262892 | 2 | 68  | LOC101927513   | 17962   | TNFRSF11B   | -97856   | NA |
| M06   | y2   | chr14+21392553 | 2 | 52  | LOC25A13       | 0       | TAC1        | -1239456 | NA |
| M06   | y2   | chr15+24557055 | 2 | 63  | TMTC2          | -72116  | PAWR        | -2403627 | NA |
| M06   | y2   | chr17-58827471 | 2 | 66  | PDZK1P1        | 0       | PIAS3       | -166716  | NA |
| M06   | y2   | chr26+31747628 | 2 | 62  | NEB            | -343531 | MAPK1       | -614608  | NA |
| M06   | y2   | chr28+10665763 | 2 | 45  | RRP12          | 6319    | FRAT1       | 27302    | NA |
| M06   | y2   | chr31+29963191 | 2 | 74  | RCAN1          | 0       | RUNX1       | 203171   | NA |
| M06   | y2   | chr35-19969893 | 2 | 52  | LINC00581      | 37319   | SOX4        | -129023  | NA |
| M06   | y2   | chr4-14746313  | 2 | 59  | EGR2           | -34341  | EGR2        | -34341   | NA |
| M06   | y2   | chr4+39589807  | 2 | 61  | DUSP1          | 0       | MIXL1       | -165262  | NA |
| M06   | y2   | chr7-33241851  | 2 | 26  | EXO1           | 0       | FH          | -314393  | NA |
| M06   | y2   | chr1-42417078  | 2 | 67  | SYNE1          | 0       | SYNE1       | 0        | NA |
| M06   | y2   | chr10-60378614 | 2 | 25  | MIR4432HG      | 124107  | BCL11A      | 209642   | NA |
| M06   | y2   | chr11-27813251 | 2 | 46  | KDM4C          | 0       | KDM4C       | 0        | NA |
| M06   | y2   | chr14-35388428 | 2 | 45  | SP4            | 0       | ABC5        | 627021   | NA |
| M06   | y2   | chr15-54263444 | 2 | 62  | PDGFC          | -23558  | FBXW7       | -3846235 | NA |
| M06   | y2   | chr15+3625821  | 2 | 69  | MACF1          | 0       | MACF1       | 0        | NA |
| M06   | y2   | chr20+17342340 | 2 | 67  | AIMP1          | -165032 | CHL1        | -357318  | NA |
| M06   | y2   | chr23+8622032  | 2 | 23  | SCN11A         | 0       | XIRP1       | 227676   | NA |
| M06   | y2   | chr28-5033380  | 2 | 65  | KIF20B         | 362621  | RET         | -1039184 | NA |
| M06   | y2   | chr32+10633798 | 2 | 59  | AFF1           | 2387    | AFF1        | 2387     | NA |
| M50   | y7   | chr20-54608016 | 2 | 72  | PTPRS          | 0       | RFX2        | 496323   | NA |
| M50   | y7   | chr22+50166197 | 2 | 61  | PCCA           | 0       | FGF14       | 1213603  | NA |
| M50   | y7   | chr32-29986493 | 2 | 69  | CFI            | -622    | EGF         | -87256   | NA |
| M50   | y7   | chr33+25455439 | 2 | 50  | CASR           | 21486   | CSTA        | -22619   | NA |
| M50   | y7   | chr4-17787487  | 2 | 20  | CTNNA3         | 0       | SIRT1       | -1401120 | NA |
| M50   | y7   | chr4+14711817  | 2 | 70  | EGR2           | 0       | EGR2        | 0        | NA |

|     |    |                |   |     |                   |         |           |          |    |
|-----|----|----------------|---|-----|-------------------|---------|-----------|----------|----|
| M50 | y7 | chr6-65773858  | 2 | 67  | ADGRL2            | 0       | ADGRL2    | 0        | NA |
| M50 | y7 | chr14+22874727 | 2 | 127 | C1GALT1           | 0       | COL28A1   | 118443   | NA |
| M50 | y7 | chr25+34601125 | 2 | 70  | EGR3              | 3980    | EGR3      | 3980     | NA |
| M50 | y7 | chr33+29230184 | 2 | 44  | TFRC              | 0       | TFRC      | 0        | NA |
| M50 | y7 | chr38-1772649  | 2 | 17  | TMCC2             | 0       | RBBP5     | -126482  | NA |
| M50 | y7 | chr5-78694771  | 2 | 80  | HCCAT5            | -27367  | ZFHX3     | -84743   | NA |
| M50 | y7 | chr6+17876405  | 2 | 65  | PRRT2             | 0       | MVP       | -9712    | NA |
| M50 | y7 | chr10-24124521 | 2 | 56  | XPNPEP3,EP300     | 0       | EP300     | 0        | NA |
| M50 | y7 | chr14-1871659  | 2 | 25  | OR2L5,OR2L3,OR2L4 | 179566  | WNT3A     | -963029  | NA |
| M50 | y7 | chr27+40595108 | 2 | 23  | CCND2-AS1         | 0       | CCND2-AS1 | 0        | NA |
| M50 | y7 | chr28+15144698 | 2 | 43  | ARL3              | 5147    | SUFU      | 29198    | NA |
| M50 | y7 | chr34-32001200 | 2 | 67  | ZBBX              | 169637  | MECOM     | 1746286  | NA |
| M50 | y7 | chr4-14713093  | 2 | 62  | EGR2              | -1121   | EGR2      | -1121    | NA |
| M50 | y7 | chr4+39589852  | 2 | 38  | DUSP1             | 0       | MIXL1     | -165307  | NA |
| M50 | y7 | chr4+65891299  | 2 | 13  | FGF10             | 0       | FGF10     | 0        | NA |
| M50 | y7 | chr6-5975701   | 2 | 73  | GTF2IRD1          | -11819  | LIMK1     | 287670   | NA |
| M50 | y7 | chr8-38607187  | 2 | 73  | SYNE2             | 0       | SYNE2     | 0        | NA |
| M66 | y6 | chr10-43140250 | 2 | 71  | AFF3              | 25562   | AFF3      | 25562    | NA |
| M66 | y6 | chr15-56522259 | 2 | 67  | HOXD-AS2          | 22810   | EEF1A1    | 2330802  | NA |
| M66 | y6 | chr16-18834023 | 2 | 67  | SHH               | -170782 | SHH       | -170782  | NA |
| M66 | y6 | chr23+43994847 | 2 | 61  | CP                | 0       | HLTF      | -76243   | NA |
| M66 | y6 | chr3+48777081  | 2 | 62  | SV2B              | 0       | AKAP13    | -214358  | NA |
| M66 | y6 | chr32+3027326  | 2 | 57  | ANXA3             | 0       | FGF5      | -1481518 | NA |
| M66 | y6 | chr16+45738385 | 2 | 65  | ACSL1             | -14656  | SORBS2    | 675110   | NA |
| M66 | y6 | chr37+13896954 | 2 | 57  | PARD3,PARD3B      | 0       | ADAM23    | -1099909 | NA |
| M66 | y6 | chr37+169848   | 2 | 50  | WDR75             | 0       | KDM3A     | 45767    | NA |
| M66 | y6 | chr5+41957696  | 2 | 21  | PEMT              | 0       | EWSR1     | -182944  | NA |
| M66 | y6 | chr15-42495602 | 2 | 42  | TDG               | 0       | HSP90B1   | 21483    | NA |
| M66 | y6 | chr25-43821788 | 2 | 31  | DIS3L2            | 0       | PTMA      | 253801   | NA |
| M66 | y6 | chr28+35981345 | 2 | 17  | DOCK1             | 0       | ADAM12    | -496135  | NA |
| M66 | y6 | chr8+33570819  | 2 | 45  | ACTR10            | -4588   | ARID4A    | -90734   | NA |



# AAV Vector Sequences

## Single Chain Vector

CAGCTGCGCGCTCGCTCGCTCACTGAGGCCGCCCGGCAAGCCCGGGCGTCCGGGCGACCTTTGGTGCCTCGCCGGCCCTCAGT  
GAGCGAGCGAGCGCGAGAGAGGGAGTGGCCAACTCCATCACTAGGGGTTCCCTTGTAGTTAATGATTAACCCGCCATGCT  
ACTTATCTACGTAGCCATGCTCTAGACCCCTAAAATGGGCAAACATTTGCAAGCAGCAAACAGCAAACACACAGCCCTCCC  
TGCCCTGCTGACCTTTGGAGCTGGGGCAGAGGTCAGAGACCTCTCTGGGCCATGCCACCTCCAACATCCACTCGACCCCTT  
GGAATTTCCGGTGGAGAGGAGCAGAGGTTGTCTTGGCGTGGTTTAGGTAGTGTGAGAGGGGAATGACTCCTTTCCGTAAGT  
GCAGTGAAGCTGTACACTGCCAGGCAAAGCGTCCGGGCAGCGTAGGCGGGCGACTCAGATCCCAGCCAGTGGACTTAG  
CCCCGTTTTGTCTCCGATAACTGGGGTGACCTTGGTTAATATTCACCAGCAGCTCCCCCGTTGCCCTCTGGATCCA  
CTGCTTAAATACGGACGAGGACAGGGCCCTGTCTCCCTCAGCTTCAGGCACCACCCTGACCTGGGACAGTGAATCCGGAC  
TCTAAGGTAAATATAAAAATTTTTAAGTGTATAATGTGTTAAACTACTGATTCTAATTTGTTTCTCTCTTTTAGGTTTAAAC  
ATCGATTGAATTCACCACATGCAAGTAGAGCTCTACACCTGCTGCTTTCTGTGCCCTTTTGCCCTTCAGCCTTAGTGCCAC  
CAGAAAATACCTACCTCGGTGTCAGTGGAACTGTCTGGGACATATGCAAAAGTACCTGCTCAGTGCCTGCACGGGATA  
CAAGCTTTTTCTCCAGGGTGCCAGGATCTTTGCCACTCACCACGTCAGTCACGTACAGAAAGACTGTGTTTGTAGAGTTT  
ACAGATGACCTTTTCAACATTGCCAAGCCAGGCCACCGTGGATGGGCTGCTGGGTCTTACCATCCAGGCTGAGGTTTA  
TGACACAGTGGTCAATGTCTTAAGAACATGGCTTCTCATCTGTGACCTTCACCTGTTGGTGTATCCTATTGGAAAG  
CTTCTGAAGGTGCTGAGTATGAGGATCAGACCAGCCAAAAGGAGAAGGAAGATGATAATGTCAATTCCTGGTGAAGCCAT  
ACCTATGTCTGGCAGGTCCTGAAAGAGAATGGCCCAATGGCCCTGATCCACCATGTCTCACCCTACTCATATTTTTTCA  
CGTGGACCTGGTGAAGACTGAAATTCAGGCCCTCATTTGGAGCCCTGCTGGTTTGCAAAAGAGGGAGCTGGCCAAAAGAA  
GGACACAGACCTTGCAGGAATTTGTCTACTTTTTGCTGTATTTGATGAAGGAAAAAGTTGGCACTCAGAAACAAATGCG  
TCTTTGACACAGGCTGAGGCCAGCATGAGCTGCACACCATCAATGGCTATGTAACAGGCTCTGCGCAGGCTTACTGT  
GTGTACAAGAGATCAGTCTATTGGCATGTGATTGGAATGGGCACCACCCCGAAGTGCACCTCAATTTTTCTCGAAGGTC  
ACACATTTCTTGTGAGGAACCACCGCCAGGCCCTCTTGGAGATCTCACCAATTACTTTCTTACTGCTCAGACATTTCTG  
ATGGACCTTGGCCAGTCTTACTGTTTTGTCTATATCCCTTCCATCAACATGATGTTATGGAAGCTTATGTCAAAGTAGA  
TAGCTGCCAGAGGAACCCAGCTGCGCATGAAAAATAATGAAGATAAAAGATTATGATGATGGTCTTTATGATTTCTGACA  
TGGACGTAGTTAGCTTTGATGACGACAGCTCTTCTCCCTTTATCCAAATCCGCTCAGTTGCCAAGAAGCATCTAAAAC  
TGGGTCACATATTTGCTGCTGAGGAGGAGGACTGGGACTATGCTCCCTCAGGCCACCCCAATGATAGAAGTCATAA  
AAATCTGATTTGAACAATGGTCTCAGCGGATTTGGTAAGAAGTACAAAAAAGTCCGATTTGTGGCATAACAGATGAGA  
CATTTAAGACTCGTGAAGCTATTCAAGTATGAATCAGGAATCCTGGGACCTTTACTTTATGGAGAAGTTGGAGACACTG  
CTGATTTATATTTAAGAACTAAGCCAGCCGGCCATATAACATCTACCCTCATGGGATCAATTATGTCACTCCTCTGCAC  
AGGGAGATTGCCAAAAGGTGTGAAACATTTGAAAGATATGCCAATTTCTGCCGGGAGAGATTTCAAGTATAAATGGACAG  
TGACCGTAGAAGATGGACCAACTAAATCAGATCCCGGTGCTGACCCGATATTTACTCAAGCTTCATTAATCTGGAGAGA  
GATCTAGCTTCAGGACTCATTGGCCCTCTTCTCATCTGCTACAAAGAATCTGTAGATCAAAGAGGAAACAGATGATGTC  
AGACAAGAGAAATGTCATCTGTTTTCTGTATTTGATGAGAATCGAAGCTGGTACCTCACAGAGAATATGCAGCGCTTCC  
TCCCAATGCAGATGTAGTGCAGCCCATGACCCAGAGTTCCAACCTCTAACAATCATGCACAGCATCAATGGCTATGTT  
TTTTGACAACATGTCAGCTGTCAAGTTTTGTTGTCATGAGGTGGCGTACTGGTACATTTCAAGTGTGGAGCAAAAACACTT  
CCTGTCTGTCTTCTTCTCTGATATACTTTCAAACACAAAATGGTCTATGAAGACACACTTACCCTCTTCCATTTCTCAG  
GAGAACTGTCTTCATGTCAATGGAAAACCCAGGCTGTGGGTTCTGGGGTGCCCAACTCAGACTTTCCGGAACAGAGGC  
ATGACAGCCTTACTGAAGTTTTCTAGTTGTAACAGGAACATTGATGATTATTATGAGGACACATACGAAGATATTTCAAC  
TCCCTGCTAAATGAAAACAATGTAATTAACCTAGAAGCTTCTCCAGAATCCACCCGTGTCAAAAACACATCAAAGGG  
AAATAACCGTTACTACTCTTACGCCAGAGGAAGACAAAATTTGAGTATGATGACACCTTCTCAATTGAAATGAAGAGAGA  
GATTTTGCATCTACCGGACTATGAAATCAGGCCCTCCGAGCTTTCAAAGAAAAACAGACACTATTTCAATTTCTGTC  
AGTGGAGCGTCTCTGGGATTATGGGATGAGTAGATCTCCCATATACTAAGAAACAGGGCTCAAAGTGGGGATGTCAGC  
AGTTCAAGAAGGTGGTTTTCCAGGAATTTACTGATGGATCCTTTACTCAGCCCTTATACCGTGGAGAAGTGAATGAACAC  
TTGGGACTCTTGGGGCCATATATAAGAGCAGAAGTTGAAGACAATATCGTGGTAACTTTCAAACCAGGCCTCTCGTCC  
CTACTCCTTCTATTTCTAGTCTTATTTCTTATGACGAAGATGAGGGACAAGGAGCAGAACCTAGAAGAAAAGTTTGTCAACC  
CTAATGAACCAAAAATTTACTTTTTGAAAGTGCAGCATCATATGGCACCCTAAAGATGAGTTTACTGCAAAAGCCTGG  
GCTTATTTTTCTGATGTTGATTTGGAGAAAAGATGTGCACTCAGGCTTGGATTGGACCCTTCTGATCTGCCCGAGTAACAC  
ACTGAACCCTGCTCATGGGAGACAAGTGACAGTGCAGGAGTTTGCCCTGGTTTTCTACTATATTCGATGAGACTAAGAGCT  
GGTACTTCACTGAAAACCTGGAAGGAAGTGTAGAGCTCCCTGCAATGTCCAGAAGGAGGACCCTACTCTAAAAGAAAAC  
TTCCGCTTCCATGCAATCAACGGCTATGTGAAGGATACACTCCCTGGCTTAGTAATGGCTCAGGATCAAAGGTTTCGATG  
GTATCTGCTCAGCATGGGCAGCAACGAAAACATTTCAATTTCACTTTCAGTGGACATGTGTTCACTGTACGGAAAAAAG  
AGGAATATAAAATGGCAGCTTACAACCTCTATCCAGTGTTTTTGAGACTGTGGAATGCTACCATCCCAAGTTGGAATC  
TGGCGGATAGAATGCCCTTATCGGCGAGCCTGCAAGCAGGGATGAGCACCCTGTTTCTGGTGTACAGCAAGAAGTGTCA  
GACTCCACTGGGGATGGCTTCCGGACACATTAGAGATTTTCAAGTTACAGCTTCCAGGACAATATGGACAGTGGGCCCAA  
AGCTGGCCAGACTTCATTTATCCGGATCAATCAATGCTGGAGCACAAGGATCCCTTTTCTGGATCAAGGTGGATCTC  
TTGGCACCAGATGATTTATTCAGGCATCATGACCCAGGGGGCCCGCAGAAGTTCTCCAGCCTCTACGTGTCTCAGTTTAT  
CATCATGTACAGTCTGGATGGCAACAAGTGGCAGTTTACCAGGGAATTCACGGGGACCTTAATGGTCTCTTTGGCA  
ACGTGGATTCATCTGGGATCAAACACAATATTTTTAACCCTCCGATTTATTGCTCAGTACACTCCGTTTGCACCAACCCAT  
TACAGCATCCGAGCACTTTCGCATGGAGCTCTTGGGCTGTGACTTCAACAGTTGCAGCATGCCCTGGGGATGGAGAG  
TAAAGCAATATCAGATGCTCAGATCACTGCCTCGTCTACCTAAGCAGTATGCTTGGCACTTGGTCTCTTCCCAAGCCC  
GGCTGCACCTGCAGGGCAGGACTAATGCCTGGAGACCTCAGGCAATAACCCAAAAGAGTGGCTGCAAGTGGACTTCCGG

AAGACCATGAAAGTCACAGGAATAACCACCCAGGGGGTGAATCTCTCCTCATCAGCATGTATGTGAAGGAGTTCCTCAT  
CTCCAGTAGTCAAGATGGCCATAACTGGACTCTGTTCTTCAGAAATGGCAAAGTCAAGGTCTTCCAGGGAAACCGGGACT  
CCTCCACGCCCTGTGCGGAACCGTCTCGAACCCCGCTGGTGGCTCGCTACGTGCGCCTGCACCCCGCAGAGCTGGGCGCAC  
CACATCGCCCTGAGGTGGAGGCTGGGCTGCGACACCCAGCCGCTGATCTAGAGCGGCCGATGCTTTATTTG  
TGAAATTTGTGATGCTATTGCTTTATTTGTAACCATATAAGCTGCAATAAACAAAGTTAACAAACAATTTGCATTCATT  
TTATGTTTCAGGTTTCAGGGGAGGTGTGGGAGGTTTTTAAATCTAGAGCATGGCTACGTAGATAAGTAGCATGGCGGGT  
TAATCATTAAC TACAAGAACCCCTAGTGATGGAGTTGGCCACTCCCTCTCTGCGCGCTCGCTCGCTCACTGAGGCCGGG  
CGACCAAAGGTCGCCGACGCCCGGGCTTTGCCCGGGCGCCTCAGTGAGCGAGCGAGCGGCCAGCTG

### Heavy Chain Vector

CAGCTGCGCGCTCGCTCGCTCACTGAGGCCGCCCGGGCAAAGCCCGGGCGTGGGGGACCTTTGGTTCGCCCGCCCTCAGT  
GAGCGAGCGAGCGCAGAGAGGGAGTGGCCAATCCATCACTAGGGGTTCTTGTAGTTAATGATTAACCCGCCATGCT  
ACTTATCTACGTAGCCATGCTCTAGGAAGATCCAGTTAATTTTTAAAAAGCAGTCAAAAGTCCAAGTGGCCCTTGGCAG  
CATTTACTCTCTGTTTGTCTGGTTAATAATCTCAGGAGCACAAAATTCCAGATCCAGGTTAATTTTTAAAAAGCAG  
TCAAAAGTCCAAGTGGCCCTTGGCAGCATTTACTCTCTCTGTTTGTCTGTTTAAATCTCAGGAGCACAAAATTTCCA  
GATCCGGCGCGCCAGGGCTGGAAGTACCTTTGACATCATTTCCTCTGCGAATGCATGTATAATTTCTACAGAACCTATT  
AGAAAGGATCACCCAGCCTCTGCTTTTGTACAACTTTCCTTAAAAAAGTGGCAATTCCTACTGCTGTTTGGCCCAATAGT  
GAGAATTTTTCTGTCGCTCTTGGTGTCTTTTGCCTATGCCCCCTATTCTGCTGCTGAAGACACTCTTGGCAGCATGG  
ACTTAAACCCCTCCAGCTCTGACAATCCTCTTTCTCTTTTGTTTTACATGAAGGGTCTGGCAGCCAAAGCAATCACTCAA  
AGTTCAAACCTTATCATTTTTTGTCTTGTCTCTTGGCCTTGGTTTTGTACATCAGCTTTGAAAATACCATCCCAGGGT  
TAATGCTGGGGTTAATTTATAACTAAGAGTGTCTAGTTTTGCAATACAGGACATGCTATAAAAAATGAAAAGATGTTGCT  
TTCTGAGAGATCTGCTTCAGCTGGAGGCACTGGGCAAGTAAAGTATCAAGGTTACAAGACAGGTTTAAAGGAGACCAATAGA  
AATGGGCTTGTGAGACAGAGAAGACTCTTGCCTTCTGATAGGCACCTATTGGTCTTACTGACATCCACTTTGCCTTT  
CTCTCCACAGGTGCAGCTGCTGCGAGCGGGAATTCAGAAGCCACTCGAGTGAATTCACCATGCAGTAGAGCTTACA  
CCTGCTGCTTTCTGTGCTTTTGCCTTTCAGCCTTAGTGCCACCAGAAAATACTACCTCGGTGCAGTGGAACTGTCTGG  
GACTATATGCAAAGTGACCTGCTCAGTGCGCTGCACGCGGATAACAAGCTTTCTTCCAGGGTGCAGGATCTTTGCCACT  
CACCAGTCACTCAGTACAGAAAGACTGTGTTTTAGAGTTTTACAGATGACCTTTTCAACATTTGCCAAGCCAGGCCAC  
CCTGGATGGGCTGCTGGGTCTTACCATCCAGGCTGAGGTTTATGACACAGTGGTCAATGTCTTTAAGAATGGCTTCT  
CATCTGTCAAGCTTACGCTGTTGGTGTATCCTATTTGAAAGCTTCTGAAGGTGCTGAGTATGAGGATCAGACCAGCCA  
AAAGGAGAAGGAAGATGATAATGTCAATTCCTGGTGAAGCCATACCTATGTCTGGCAGGTCCTGAAAGAGAATGGCCCAA  
TGGCCTCTGATCCACCATGTCTCACTACTCATATTTTTACACGTGGACCTGGTGAAGACCTGAATTCAGGCCCTCATT  
GGAGCCCTGCTGGTTTTGCAAAGAAGGAGTCTGGCCAAAGAAAGGACACAGACCTTGCAGGAATTTGTCTACTTTTTGC  
TGTATTTGATGAAGGAAAAGTTGGCACTCAGAAACAAATGCGTCTTTGACACAGGCTGAGGCCAGCATGAGCTGCACA  
CCATCAATGGCTATGTAACAGGCTCTGCCAGGCTTACTGTGTGTCAAGAGATCAGTCTATTGGCATGTGATTTGGA  
ATGGGACCACCCCAAGTGCACCTCAATTTTTCTGAAGTGCACATTTCTTGTGAGGAACCCAGCCAGCCCTCTT  
GGATCTCACCAATTTACTTTCTTCTGCTCAGACATTCCTGATGACCTTGGCAGCTTTCTACTGTTTTGTCAATCC  
CTTCCATCAACATGATGGTATGGAAGCTTATGTCAAAGTAGATAGCTGCCAGAGGAACCCAGCTGCGCATGAAAAAT  
AATGAAGATAAAGATTTATGATGATGGTCTTTATGATCTGACATGGACGTAGTTAGCTTTGATGACGACAGCTCTTCTCC  
CTTTATCCAAATCCGCTCAGTTGCCAAGAAGCATCTAAACTTTGGGTCCACTATATTTGCTGCTGAGGAGGAGGACTGGG  
ACTATGCTCCCTCAGGCCCCACCCCAATGATAGAAGTCAAAAAATCTGTATTTGAACAATGGTCTCAGCGGATTTGGT  
AAGAAGTACAAAAAAGTCCGATTTTGTGGCATAACAGATGAGACATTTAAGACTCGTGAAGCTATTCAAGTAAATCAGG  
AATCTTGGGACCTTTACTTATGGAGAAGTTGGAGACACACTGATTTACTTTAAGAATCAAGCCAGCCGCGCATATA  
ACATCTACCCTCATGGGATCAATTTATGTCCTCTGACACAGGGAGATTGCCAAAAGGTGTGAAAACATTTGAAAAGAT  
ATGCCAATCTGCGGGAGAGATATCAAGTATAAATGGACAGTGACCGTAGAAGATGGACCAACTAAATCAGATCCTCG  
GTGCTGACCCGATATTACTCAAGCTTCATTAATCTGGAGAGAGATCTAGCTTCCAGGACTCATTTGCCCTCTTCTCATCT  
GCTACAAAAGATCTGTAGATCAAGAGGAAACCAGATGATGTGACACAAGAGAAATGTCATCTGTTTTCTGTATTTGAT  
GAGAAATCGAAGCTGTTACCTCACAGAGAATATGCAGCGCTTCCCTCCCAATGCAGATGTAGTGCAGCCCATGACCCAGA  
GTTCCAACTCTCTAACATCATGCACAGCATCAATGGCTATGTTTTGACAACCTGCAGCTGTCTAGTTTTGTTTGCATGAGG  
TGGCGTACTGGTACATTTAAGTGTGGAGCACAACTGACTTCTGTCTGCTTCTCTCTGGATATACTTCAAACAC  
AAAATGGTCTATGAAGACACACTTACCCTCTTCCATTTCTCAGGAGAACTGTCTTCATGTCAATGGAAAACCCAGGCT  
GTGGGTTCTGGGGTGCACAACCTCAGACTTTTCGGAACAGAGGATGACAGCCTTACTGAAGGTTTTCTAGTTGTAACAGGA  
ACATTTGATGATTATTTAGAGGACACATACGAAGATATTTCAACTCCCCTGCTAAATGAAAACAATGTAATTAACCTAGA  
AGCTTCTCCAGAATTCGAAGCACCTTAGCACTAAGGAAAAGCAATTTGAAAGCCACCACAACCTCCAGAAAATGACATAGA  
GAAGATTGACCTTCAATCTGGAGAAAGAACACAGCTGATTAAGCACAAAAGTGTCTCTCTAGTGATTTGTTGATGCTGT  
TGGGACAGAATCTTACTCCACGTGGACTGTTCTTATCTGATCTCCGAGAGGCCACAGATAGAGCCGATGACCATTACGCT  
GGAGCAATAGAAAAGAAACAAGGGCTGAGCGGCCGCTTCGAGCAGACATGATAAGATACATTGATGAGTTTGGACAAACCA  
CAACTAGAATGCAGTGAAAAAATGCTTTATTTGTGAAATTTGTGATGCTATTGCTTTATTTGTAAACATTATAAGCTGC  
AATAAACAAGTTTACAACAACAATTCATTTATGTTTTCAGGTTTCAGGGGAGATGTGGGAGGTTTTTTTAAAGCAA  
GTAAAACCTTACAATGTGGTAAAAATCGATAAGGATCTTCTTAGAGCATGGCTACGTAGATAAGTAGCATGAGTGGCGGGTTA  
ATCATTAAC TACAAGAACCCCTAGTGATGGAGTTGGCCACTCCCTCTCTGCGCGCTCGCTCGCTCACTGAGGCCGGGG  
ACCAAAGGTCGCCGACGCCCGGGCTTTGCCCGGGCGCCTCAGTGAGCGAGCGAGCGGCCAGCTG

## Light Chain Vector

CAGCTGCGCGCTCGCTCGCTCACTGAGGCCGCCGGGCAAAGCCCGGGCGTGGGGCGACCTTTGGTGC GCCCGCCCTCAGT  
GAGCGAGCGAGCGCGAGAGAGGGAGTGGCCAACTCCATCACTAGGGGTTCCCTGTAGTTAATGATTAACCCGCCATGCT  
ACTTATCTACGTAGCCATGCTCTAGGAAGATCCAGGTTAATTTTTAAAAAGCAGTCAAAGTCCAAGTGGCCCTTGGCAG  
CATTTACTCTCTCTGTTTGTCTGGTTAATAATCTCAGGAGCACAAAATTCCAGATCCAGGTTAATTTTTAAAAAGCAG  
TCAAAGTCCAAGTGGCCCTTGGCAGCATTTACTCTCTCTGTTTGCCTGGTTAATAATCTCAGGAGCACAAAATTCCA  
GATCCGGCGCGCCAGGGCTGGAAGCTACCTTTGACATCATTTCTCTGCGAATGCATGTATAATTTCTACAGAACCATT  
AGAAAGATCACCCAGCTCTGCTTTTGTACAACTTCCCTTAAAAAAGTCCAAATCCACTGCTGTTTGGCCCAATAGT  
GAGAACTTTTTCTGCTGCTCTTGGTGTCTTTGCTATGGCCCTATTCTGCTGCTGAAGACACTCTTGCCAGCATGG  
ACTTAAACCCCTCCAGCTCTGACAATCCTCTTTCTCTTTTGTTTTACATGAAGGGTCTGGCAGCCAAAGCAATCACTCAA  
AGTTCAAACCTTATCATTTTTTGTCTTGTCTCTTGGCCCTGGTGTGTACATCAGCTTTGAAAATACCATCCAGGGT  
TAATGCTGGGGTTAATTTATAACTAAGAGTGTCTTAGTTTTGCAATACAGGACATGCTATAAAAAATGGAAAGATGTGCT  
TTCTGAGAGATCTGCTTCAGCTGGAGGCACTGGGCAGGTAAGTATCAAGGTTACAAGACAGGTTTAAAGGAGACCAATAGA  
AACTGGGCTTGTGAGACAGAGAAGACTCTTGGCTTCTGATAGGCACCTATTGGTCTTACTGACATCCACTTTGCTTTT  
CTCTCCACAGGTGCAGCTGCTGCAGCGGAATTCAGAAGCCACTCGAGGTCGACGGTATCGATTGAATCCCACCATGC  
AAGTAGAGCTTACACCTGCTGCTTTCTGTGCTTTTGGCCCTTCCAGCTTAGTGGTGTCTTGTCTGGGATAACCACTAT  
GATACCCAGATACCAAGTGAAGAGTGAAGATCCCAAAAAAGTACAGACGAACACAGCTTTTAAAGGAAAGACACCAT  
TTTTGCCCTGCCCCGGGAAAATAATGATTCAACAGCAGCAATAAATGAAGGACAAGATAAGCCCCAAAGAGAAGCTATGT  
GGGCAAAGCAAGGAGAGCCTGGAAGGTTGTGCTCAAAAACCCAGCTCTCAAAACACCATCAAAGGGAAATAACCGTT  
ACTACTCTTCAGCCAGAGGAAGACAATTTGAGTATGATGACACCTTCTCAATTGAAATGAAGAGAGAAGATTTTGACAT  
CTACGGCGACTATGAAAATCAGGGCTCCCGCAGCTTTCAAAGAAAACACGACACTATTTTCATTTGCTGCAGTGGAGCGTC  
TCTGGGATATGGGATGAGTAGATCTCCCATATACTAAGAAACAGGGCTCAAAGTGGGGATGTCAGCAGTTCAAGAAG  
GTGGTTTTTCAGGAATTTACTGATGGATCCTTTACTCAGCCCTTATACCGTGGAGAAGTGAATGAACACTGGGACTCTT  
GGGCCATATATAAGAGCAGAAGTTGAAGACAATATCGTGGTAACTTTCAAACCCAGGCTCTCGTCCCTACTCTCTCT  
ATTTAGTCTTATTTCTTATGACGAAGATGAGGGACAAGGAGCAGAACC TAGAAGAAAGTTTGTCAACCCTAATGAAACC  
AAAATTTACTTTTGGAAAGTGCAGCATCATATGGCACCCACTAAAGATGAGTTTACTGCAAAGCTGGGCTTATTTTTC  
TGATGTTGATTTGGAGAAAGATGTGCACTCAGGCTTGATTGGACCCCTTCTGATCTGCCCGAGTAACACACTGAACCCCTG  
CTCATGGGAGACAAGTGACAGTGCAGGAGTTTGCCTGGTTTTACTATATTCGATGAGACTAAGAGCTGGTACTTCACT  
GAAAACCTGGAAAGGAAGTGTAGAGCTCCCTGCAATGTCCAGAAGGAGGACCCACTCTAAAAGAAAACCTCCGCTTCCA  
TGCAATCAACGGCTATGTGAAGGATACACTCCCTGGCTTAGTAATGGCTCAGGATCAAAGGTTTCGATGGTATCTGCTCA  
GCATGGGCGACAACGAAAACATTCATTCATTCACTTCAGTGGACATGTGTTCACTGTACGGAAAAAGAGGAATATAAA  
ATGGCAGTCTACAACCTCTATCCAGGTGTTTTTGAGACTGTGGAAATGCTACCATCCCAAGTTGGAATCTGGCGGATAGA  
ATGCCCTATCGGGAGCACCTGCAAGCCGGGATGAGCACTCTGTTTTCTGGTGTACAGCAAGAAGTGTGAGACTCCACTGG  
GGATGGCTTCCGGACATTAGAGATTTTCAGATTACAGTTCCAGGGCAATATGGACAGTGGGCCCCAAAGCTGGCCAGA  
CTTCATTTATCCGGATCAATCAATGCCTGGAGACC AAGGATCCCTTTCTGGATCAAGGTGGATCTCTTGGCACCGAT  
GATTTATTCAGGCATCATGACCCAGGGGGCCCGCAGAAGTCTCCAGCCTCTACGTGTCTCAGTTTATCATCATGTACA  
GTCCTGGATGGCAACAAGTGGCACAGTTACCGAGGGAATTCACGGGGACCTTAATGGTCTTCTTTGGCAACGTGGATTCA  
TCTGGGATCAAACACAATATTTTTAACCCTCCGATTTATGCTCAGTACATCCGTTTGCACCCAACCCATTACAGCATCCG  
CAGCACTCTTCGCATGGAGCTCTTGGGCTGTGACTTCAACAGTTGCAGCATGCCGCTGGGGATGGAGAGTAAAGCAATAT  
CAGATGCTCAGATCACTGCCTCGTCTACCTAAGCAGTATGCTTGCCTTGGTCTCTTCCCAAGCCCGGCTGCACCTG  
CAGGCAGGACTAATGCTGGAGACTCAGGCAATAACCCAAAAGAGTGGCTGCAAGTGGACTTCCGGAAAGACCATGAA  
AGTCAACAGGAATAACCAACCCAGGGGGTGAATCTCTCTCATCAGCATGTATGTGAAGGAGTTCTCATCTCCAGTAGTC  
AAGATGGCCATAACTGGAATCTGTTCTTTCAGAAATGGCAAAGTCAAGGCTTCCAGGGAAACCGGACTCTCCACGCCT  
GTGCGGAACCGTCTCGAACCCCGCTGGTGGCTCGCTACGTGCGCTGCACCCGCAGAGCTGGGCGACCAATCGCCCT  
GAGGCTGGAGGTCCTGGGCTGCGACACCCAGCAGCCCGCTGATCTAGAGCGGGCGCTTCGAGCAGACATGATAAGATAC  
ATTTGATGAGTTGGACAACCACTAGAATGCAGTGAAAAAATGCTTTATTTGTGAAATTTGTGATGCTATTGCTTT  
ATTTGTAACCAATTATAAGCTGCAATAAAACAAGTTAACAACAACAATTCATTCTTTATGTTTTAGGTTTCAAGGTTCAAGGGGAGA  
TGTGGGAGGTTTTTTAAAGCAAGTAAAACCTCTACAAAATGTGGTAAAATCGATAAGGATCTTCTTAGAGCATGGCTACGT  
AGATAAGTAGCATGGCGGGTTAATCATTAAC TACAAGAACTCCCTATGATGGAGTTGGCCACTCCCTCTCTGCGCGCTC  
GCTCGCTCACTGAGGCCGGGCGACCAAAGGTCGCCCCGACGCCCGGCTTTGCCCGGGCGCCCTCAGTGAGCGAGCGAGCG  
CGCAGCTG
