# Supplementary material
Source: PubMed Central journal article supplement (PMC7855056)

### Supplementary Figure 4

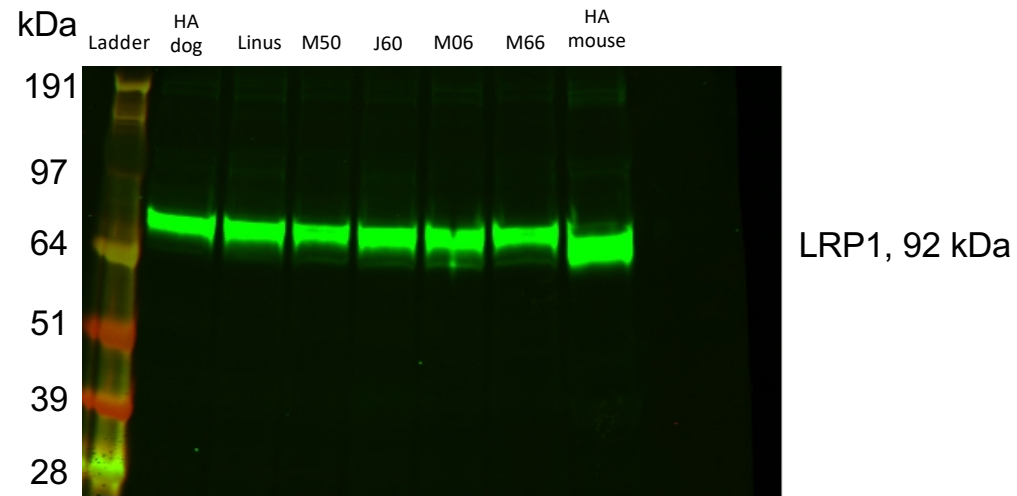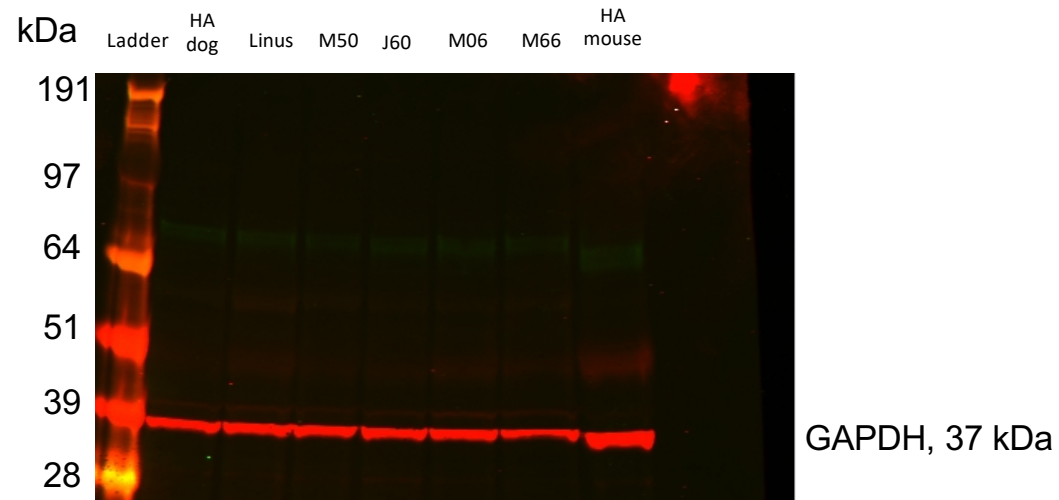

Supplement: NIHMS1638539-supplement-2.pdf [file NIHMS1638539-supplement-2.pdf]
